# Supplementary material
Source: PubMed Central journal article supplement (PMC8130889)
Supplement: NIHMS1698596-supplement-Supplemental_Material.pdf [file NIHMS1698596-supplement-Supplemental_Material.pdf]

**A** Prostate disease DMR biomarkers

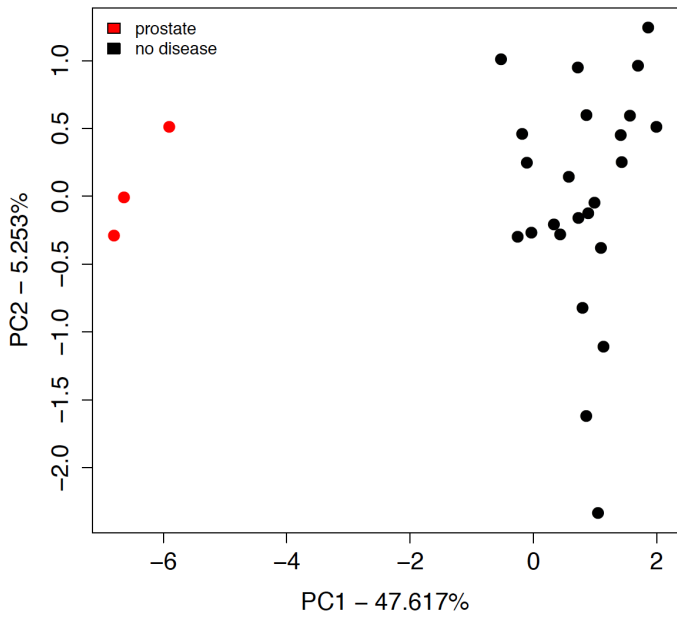

**B** Kidney disease DMR biomarkers

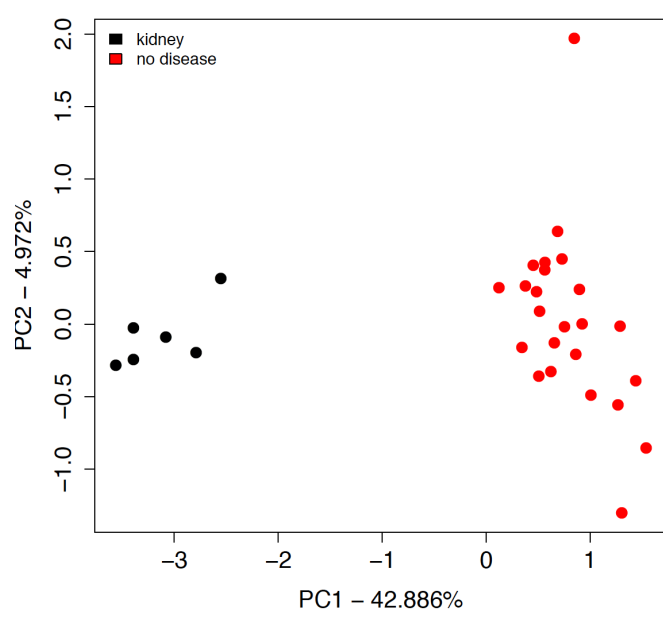

**C** Obesity disease DMR biomarkers

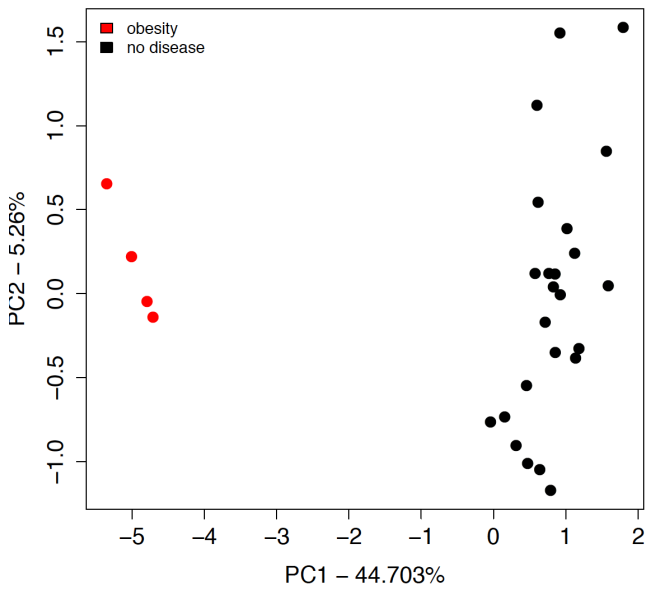

**D** Testis disease DMR biomarkers

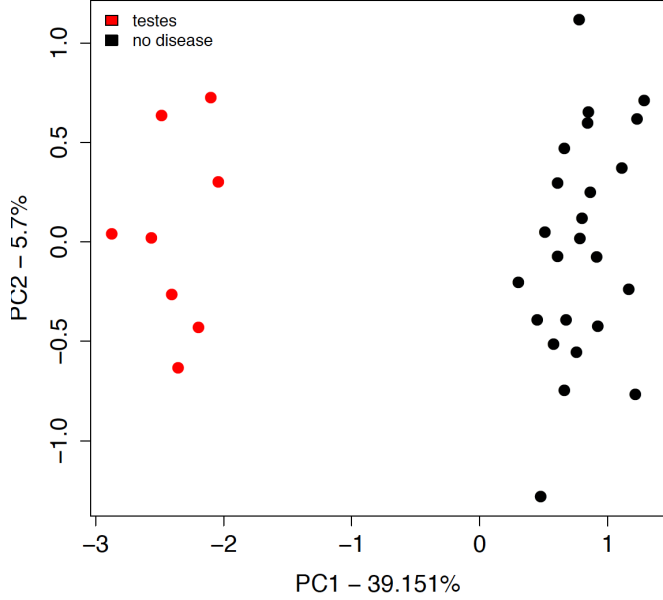

**Supplemental Table S1**  
**Dioxin Study Transgenerational Control Pathology**

| Molecular ID  | Early Puberty | Late Puberty | Testis Disease | Prostate Disease | Kidney Disease | Obesity      | Tumor        | Multiple Disease | Total Disease |
|---------------|---------------|--------------|----------------|------------------|----------------|--------------|--------------|------------------|---------------|
| DC51          | -             | -            | +              | -                | -              | -            | -            | -                | 1             |
| DC1           | -             | -            | -              | -                | -              | -            | -            | -                | 0             |
| DC2           | -             | -            | +              | -                | +              | -            | -            | +                | 2             |
| DC3           | -             | -            | +              | -                | +              | -            | -            | +                | 2             |
| DC52          | -             | -            | +              | -                | -              | -            | -            | -                | 1             |
| DC4           | -             | -            | n/a            | -                | -              | -            | -            | -                | n/a           |
| DC5           | -             | -            | -              | -                | -              | -            | -            | -                | 0             |
| DC6           | -             | -            | -              | -                | -              | -            | -            | -                | 0             |
| DC7           | -             | -            | -              | -                | -              | -            | -            | -                | 0             |
| DC8           | -             | -            | -              | -                | -              | -            | -            | -                | 0             |
| DC9           | -             | -            | -              | -                | -              | -            | -            | -                | 0             |
| DC10          | -             | -            | -              | -                | -              | -            | -            | -                | 0             |
| DC11          | -             | -            | -              | +                | -              | -            | -            | -                | 1             |
| DC12          | -             | -            | -              | -                | -              | -            | -            | -                | 0             |
| DC13          | -             | -            | +              | -                | -              | -            | -            | -                | 1             |
| DC14          | -             | -            | -              | n/a              | -              | -            | -            | -                | n/a           |
| DC15          | -             | -            | -              | n/a              | -              | -            | -            | -                | n/a           |
| DC16          | -             | -            | -              | n/a              | -              | -            | -            | -                | n/a           |
| DC17          | -             | -            | n/a            | -                | +              | -            | -            | -                | 1             |
| DC53          | -             | -            | -              | -                | -              | -            | -            | -                | 0             |
| DC18          | -             | -            | -              | -                | -              | -            | -            | -                | 0             |
| DC19          | -             | -            | -              | -                | +              | -            | -            | -                | 1             |
| DC20          | -             | +            | n/a            | -                | -              | -            | -            | -                | 1             |
| DC54          | -             | -            | -              | -                | -              | -            | -            | -                | 0             |
| DC55          | -             | -            | -              | -                | -              | -            | -            | -                | 0             |
| DC21          | -             | -            | -              | -                | -              | -            | -            | -                | 0             |
| DC22          | -             | -            | -              | -                | -              | -            | -            | -                | 0             |
| DC56          | -             | -            | -              | n/a              | -              | -            | -            | -                | n/a           |
| DC57          | -             | -            | n/a            | -                | -              | -            | -            | -                | n/a           |
| DC23          | -             | -            | -              | +                | -              | -            | -            | -                | 1             |
| DC24          | -             | -            | -              | +                | +              | -            | -            | +                | 2             |
| DC25          | +             | -            | -              | +                | -              | -            | -            | +                | 2             |
| DC26          | +             | -            | -              | +                | -              | -            | -            | +                | 2             |
| DC27          | +             | -            | -              | -                | -              | -            | -            | -                | 1             |
| DC28          | -             | -            | -              | -                | -              | -            | -            | -                | 0             |
| DC29          | -             | -            | -              | n/a              | -              | -            | -            | -                | n/a           |
| DC30          | -             | -            | -              | -                | -              | -            | -            | -                | 0             |
| DC31          | -             | -            | -              | +                | -              | -            | -            | -                | 1             |
| DC32          | -             | -            | -              | +                | -              | -            | -            | -                | 1             |
| DC33          | -             | -            | -              | -                | -              | -            | -            | -                | 0             |
| DC34          | -             | -            | -              | +                | +              | -            | -            | +                | 2             |
| DC35          | -             | -            | -              | -                | -              | -            | -            | -                | 0             |
| DC36          | -             | -            | -              | -                | -              | -            | -            | -                | 0             |
| DC60          | -             | -            | n/a            | -                | +              | -            | -            | -                | 1             |
| DC37          | -             | -            | n/a            | -                | -              | -            | -            | -                | n/a           |
| DC38          | -             | -            | +              | +                | -              | -            | -            | +                | 2             |
| DC39          | n/a           | n/a          | -              | -                | +              | -            | -            | -                | 1             |
| DC40          | n/a           | n/a          | n/a            | n/a              | +              | -            | -            | -                | 1             |
| DC41          | n/a           | n/a          | -              | n/a              | -              | -            | -            | -                | n/a           |
| DC42          | -             | -            | -              | -                | -              | -            | -            | -                | 0             |
| DC43          | -             | -            | -              | -                | +              | -            | -            | -                | 1             |
| DC44          | -             | -            | +              | n/a              | -              | -            | -            | -                | 1             |
| DC45          | -             | -            | -              | -                | -              | -            | -            | -                | 0             |
| DC46          | -             | -            | -              | -                | -              | -            | -            | -                | 0             |
| DC47          | -             | -            | -              | -                | -              | -            | -            | -                | 0             |
| DC48          | -             | -            | -              | -                | -              | -            | -            | -                | 0             |
| DC49          | -             | -            | -              | -                | -              | -            | -            | -                | 0             |
| DC50          | -             | -            | -              | -                | -              | -            | -            | -                | 0             |
| <b>Totals</b> | 3/55 =<br>5%  | 1/55 =<br>2% | 7/51 =<br>14%  | 8/50 =<br>16%    | 10/58 =<br>17% | 0/58 =<br>0% | 0/58 =<br>0% | 6/58 =<br>10%    |               |

**Supplemental Table S2**  
**DMR Site Table Dioxin Prostate Disease p<1e-04**

| DMR Name       | Chr | Start     | Stop      | Length | # Sig Win | minP     | maxLFC     | CpG # | CpG Density | Gene Annotation        | Gene Category |
|----------------|-----|-----------|-----------|--------|-----------|----------|------------|-------|-------------|------------------------|---------------|
| DMR1:5833001   | 1   | 5833001   | 5834000   | 1000   | 1         | 9.82E-05 | -1.3343037 | 6     | 0.6         |                        |               |
| DMR1:8265001   | 1   | 8265001   | 8266000   | 1000   | 1         | 4.53E-05 | 0.5657778  | 25    | 2.5         |                        |               |
| DMR1:17920001  | 1   | 17920001  | 17921000  | 1000   | 1         | 7.67E-05 | -1.6592805 | 14    | 1.4         | Ptprk                  | Signaling     |
| DMR1:47211001  | 1   | 47211001  | 47212000  | 1000   | 1         | 9.26E-05 | 0.8313245  | 16    | 1.6         | Tmem181;Dyln1t1        | Development   |
| DMR1:96409001  | 1   | 96409001  | 96410000  | 1000   | 1         | 8.82E-05 | 0.6387662  | 18    | 1.8         |                        |               |
| DMR1:123713001 | 1   | 123713001 | 123714000 | 1000   | 1         | 6.54E-05 | -1.6048078 | 5     | 0.5         |                        |               |
| DMR1:131120001 | 1   | 131120001 | 131121000 | 1000   | 1         | 7.93E-05 | -1.0417797 | 9     | 0.9         |                        |               |
| DMR1:133513001 | 1   | 133513001 | 133514000 | 1000   | 1         | 7.21E-05 | -1.3535613 | 4     | 0.4         | Mctp2                  |               |
| DMR1:136084001 | 1   | 136084001 | 136085000 | 1000   | 1         | 2.29E-05 | -1.5916141 | 16    | 1.6         | AABR07004297.1         |               |
| DMR1:140509001 | 1   | 140509001 | 140510000 | 1000   | 1         | 4.57E-05 | 0.9129188  | 14    | 1.4         | Det1                   | Metabolism    |
| DMR1:183337001 | 1   | 183337001 | 183339000 | 2000   | 1         | 3.38E-05 | -1.2689579 | 15    | 0.75        |                        |               |
| DMR1:199207001 | 1   | 199207001 | 199208000 | 1000   | 1         | 5.21E-05 | 0.6994345  | 20    | 2           | Fbxl19;Orai3           |               |
| DMR1:201291001 | 1   | 201291001 | 201293000 | 2000   | 1         | 9.74E-05 | 0.7148177  | 23    | 1.15        | Tacc2                  | Unknown       |
| DMR1:216269001 | 1   | 216269001 | 216270000 | 1000   | 1         | 1.18E-05 | 0.7575794  | 25    | 2.5         | Trpm5                  | Receptor      |
| DMR1:223501001 | 1   | 223501001 | 223502000 | 1000   | 1         | 1.37E-05 | -1.3593447 | 8     | 0.8         |                        |               |
| DMR1:243888001 | 1   | 243888001 | 243889000 | 1000   | 1         | 7.08E-07 | -1.8136139 | 4     | 0.4         |                        |               |
| DMR1:254150001 | 1   | 254150001 | 254151000 | 1000   | 1         | 1.51E-05 | -1.7085781 | 5     | 0.5         |                        |               |
| DMR2:6354001   | 2   | 6354001   | 6355000   | 1000   | 1         | 5.81E-05 | -0.8139241 | 11    | 1.1         |                        |               |
| DMR2:26163001  | 2   | 26163001  | 26164000  | 1000   | 1         | 4.27E-05 | 0.7395814  | 27    | 2.7         | Iqgap2                 | Signaling     |
| DMR2:31069001  | 2   | 31069001  | 31070000  | 1000   | 1         | 6.11E-05 | -1.0258459 | 12    | 1.2         |                        |               |
| DMR2:50639001  | 2   | 50639001  | 50640000  | 1000   | 1         | 1.49E-05 | -2.0967792 | 3     | 0.3         |                        |               |
| DMR2:153998001 | 2   | 153998001 | 153999000 | 1000   | 1         | 2.50E-05 | -1.5283264 | 24    | 2.4         |                        |               |
| DMR2:160711001 | 2   | 160711001 | 160714000 | 3000   | 1         | 1.62E-05 | 1.0512108  | 42    | 1.4         |                        |               |
| DMR2:170163001 | 2   | 170163001 | 170164000 | 1000   | 1         | 1.79E-05 | -1.5142331 | 2     | 0.2         |                        |               |
| DMR2:171549001 | 2   | 171549001 | 171550000 | 1000   | 1         | 4.17E-05 | -1.6427554 | 3     | 0.3         |                        |               |
| DMR2:180746001 | 2   | 180746001 | 180747000 | 1000   | 1         | 2.72E-05 | -0.620769  | 9     | 0.9         |                        |               |
| DMR2:210993001 | 2   | 210993001 | 210994000 | 1000   | 1         | 2.64E-05 | -1.5036451 | 15    | 1.5         | Cyb561d1;Atxn7l2;Sypl2 | Transport     |
| DMR2:219275001 | 2   | 219275001 | 219276000 | 1000   | 1         | 8.93E-06 | 0.8915387  | 24    | 2.4         |                        |               |
| DMR2:220600001 | 2   | 220600001 | 220601000 | 1000   | 1         | 7.44E-06 | -1.7034749 | 7     | 0.7         |                        |               |
| DMR2:238455001 | 2   | 238455001 | 238457000 | 2000   | 1         | 6.61E-05 | -1.4812748 | 29    | 1.45        | LOC102556447           |               |
| DMR2:245301001 | 2   | 245301001 | 245302000 | 1000   | 1         | 4.14E-05 | -1.160217  | 8     | 0.8         |                        |               |
| DMR2:250872001 | 2   | 250872001 | 250874000 | 2000   | 1         | 1.45E-05 | 1.1331425  | 27    | 1.35        | Cla4                   | Transport     |
| DMR2:255282001 | 2   | 255282001 | 255283000 | 1000   | 1         | 8.00E-05 | -1.9788829 | 24    | 2.4         |                        |               |
| DMR3:4010001   | 3   | 4010001   | 4011000   | 1000   | 1         | 6.76E-05 | 0.8382529  | 19    | 1.9         | AC111292.4             |               |
| DMR3:5546001   | 3   | 5546001   | 5547000   | 1000   | 1         | 9.96E-05 | 0.8850322  | 28    | 2.8         | Adamts13;Cacfd1        | Protease      |
| DMR3:6391001   | 3   | 6391001   | 6392000   | 1000   | 1         | 4.63E-05 | -1.6783955 | 10    | 1           |                        |               |
| DMR3:9016001   | 3   | 9016001   | 9017000   | 1000   | 1         | 2.15E-05 | 0.9250249  | 17    | 1.7         | Ptpa                   | Signaling     |
| DMR3:24002001  | 3   | 24002001  | 24003000  | 1000   | 1         | 4.92E-05 | -1.1017593 | 8     | 0.8         |                        |               |
| DMR3:35680001  | 3   | 35680001  | 35681000  | 1000   | 1         | 6.25E-06 | 0.845074   | 15    | 1.5         | Lypd6                  |               |
| DMR3:53014001  | 3   | 53014001  | 53015000  | 1000   | 1         | 3.09E-05 | -1.5947981 | 13    | 1.3         |                        |               |
| DMR3:81067001  | 3   | 81067001  | 81068000  | 1000   | 1         | 7.56E-05 | -1.2661926 | 8     | 0.8         |                        |               |
| DMR3:108877001 | 3   | 108877001 | 108879000 | 2000   | 1         | 3.50E-05 | 0.6203313  | 32    | 1.6         |                        |               |
| DMR3:118048001 | 3   | 118048001 | 118049000 | 1000   | 1         | 2.25E-05 | -1.2228094 | 11    | 1.1         | Secisbp2l              | Receptor      |
| DMR3:139596001 | 3   | 139596001 | 139597000 | 1000   | 1         | 2.23E-05 | -1.3959999 | 20    | 2           |                        |               |
| DMR3:166639001 | 3   | 166639001 | 166640000 | 1000   | 1         | 5.24E-05 | 0.6205318  | 23    | 2.3         |                        |               |
| DMR4:6030001   | 4   | 6030001   | 6031000   | 1000   | 1         | 2.92E-05 | 0.8554368  | 15    | 1.5         | LOC100363537           |               |
| DMR4:47751001  | 4   | 47751001  | 47752000  | 1000   | 1         | 8.00E-07 | -2.4559721 | 3     | 0.3         |                        |               |
| DMR4:64967001  | 4   | 64967001  | 64968000  | 1000   | 1         | 2.38E-05 | 0.7451074  | 14    | 1.4         | Creb3l2                | Transcription |
| DMR4:73681001  | 4   | 73681001  | 73683000  | 2000   | 1         | 4.52E-07 | 1.0366938  | 17    | 0.85        |                        |               |
| DMR4:123017001 | 4   | 123017001 | 123018000 | 1000   | 1         | 5.29E-05 | 0.7519034  | 23    | 2.3         | Wnt7a                  | Signaling     |
| DMR4:130202001 | 4   | 130202001 | 130203000 | 1000   | 1         | 3.62E-05 | -1.8082076 | 8     | 0.8         | Mitf                   | Transcription |
| DMR4:131055001 | 4   | 131055001 | 131056000 | 1000   | 1         | 1.26E-05 | -1.7959671 | 14    | 1.4         |                        |               |
| DMR4:139174001 | 4   | 139174001 | 139175000 | 1000   | 1         | 9.76E-05 | -1.1046735 | 8     | 0.8         | 7SK                    |               |
| DMR4:146444001 | 4   | 146444001 | 146445000 | 1000   | 1         | 3.11E-05 | -1.3128279 | 8     | 0.8         |                        |               |
| DMR4:149940001 | 4   | 149940001 | 149941000 | 1000   | 1         | 1.67E-05 | 0.9300867  | 20    | 2           |                        |               |
| DMR5:13382001  | 5   | 13382001  | 13383000  | 1000   | 1         | 6.53E-07 | 1.0459768  | 10    | 1           | Npbwr1                 | Receptor      |

|                |    |           |           |      |   |          |            |    |       |                                          |               |
|----------------|----|-----------|-----------|------|---|----------|------------|----|-------|------------------------------------------|---------------|
| DMR5:35382001  | 5  | 35382001  | 35383000  | 1000 | 1 | 6.25E-05 | -1.6612027 | 11 | 1.1   |                                          |               |
| DMR5:116708001 | 5  | 116708001 | 116709000 | 1000 | 1 | 7.31E-05 | -1.2488348 | 10 | 1     | Nfia                                     | Transcription |
| DMR5:121119001 | 5  | 121119001 | 121120000 | 1000 | 1 | 3.14E-06 | -0.9940068 | 11 | 1.1   |                                          |               |
| DMR5:158920001 | 5  | 158920001 | 158921000 | 1000 | 1 | 6.61E-05 | 0.7342253  | 16 | 1.6   |                                          |               |
| DMR5:172655001 | 5  | 172655001 | 172656000 | 1000 | 1 | 8.46E-05 | -1.4681247 | 13 | 1.3   | Faap20;Prkcz                             | Signaling     |
| DMR6:9526001   | 6  | 9526001   | 9527000   | 1000 | 1 | 2.75E-05 | 0.6022799  | 22 | 2.2   | AABR07062799.1                           |               |
| DMR6:10689001  | 6  | 10689001  | 10691000  | 2000 | 1 | 7.55E-07 | 0.9971092  | 40 | 2     | Socs5                                    | Signaling     |
| DMR6:21883001  | 6  | 21883001  | 21884000  | 1000 | 1 | 3.45E-05 | -1.6012637 | 11 | 1.1   | Ttc27                                    |               |
| DMR6:25541001  | 6  | 25541001  | 25542000  | 1000 | 1 | 6.64E-05 | 0.5692356  | 18 | 1.8   |                                          |               |
| DMR6:37225001  | 6  | 37225001  | 37226000  | 1000 | 1 | 6.65E-05 | -1.6432265 | 12 | 1.2   |                                          |               |
| DMR6:38283001  | 6  | 38283001  | 38284000  | 1000 | 1 | 1.31E-05 | -1.5930236 | 9  | 0.9   |                                          |               |
| DMR6:47281001  | 6  | 47281001  | 47282000  | 1000 | 1 | 2.04E-06 | -1.2953161 | 6  | 0.6   |                                          |               |
| DMR6:56771001  | 6  | 56771001  | 56772000  | 1000 | 1 | 3.07E-05 | 1.0823833  | 3  | 0.3   | Vom2r49                                  | Receptor      |
| DMR6:72781001  | 6  | 72781001  | 72782000  | 1000 | 1 | 6.99E-05 | -2.6861833 | 23 | 2.3   | Dtd2                                     |               |
| DMR6:72957001  | 6  | 72957001  | 72958000  | 1000 | 1 | 2.85E-05 | -1.5656031 | 2  | 0.2   | Nubpl                                    | Metabolism    |
| DMR6:95892001  | 6  | 95892001  | 95893000  | 1000 | 1 | 2.78E-05 | -1.6462702 | 11 | 1.1   | AABR07064811.1                           |               |
| DMR6:105557001 | 6  | 105557001 | 105559000 | 2000 | 1 | 5.74E-05 | 0.7011978  | 28 | 1.4   | AABR07065044.1                           |               |
| DMR6:110264001 | 6  | 110264001 | 110265000 | 1000 | 1 | 5.06E-05 | 0.6912134  | 8  | 0.8   | AABR07065113.2                           |               |
| DMR6:135417001 | 6  | 135417001 | 135418000 | 1000 | 1 | 3.99E-05 | 0.9035267  | 22 | 2.2   | Ankrd9                                   |               |
| DMR6:138089001 | 6  | 138089001 | 138090000 | 1000 | 1 | 1.06E-05 | -1.721641  | 16 | 1.6   | Ighm;lgh-6                               |               |
| DMR6:146112001 | 6  | 146112001 | 146113000 | 1000 | 1 | 1.42E-05 | 0.9757212  | 11 | 1.1   |                                          |               |
| DMR7:11158001  | 7  | 11158001  | 11160000  | 2000 | 1 | 4.68E-05 | 0.6825496  | 73 | 3.65  | Nfic                                     | Transcription |
| DMR7:12969001  | 7  | 12969001  | 12971000  | 2000 | 1 | 8.24E-05 | 0.8757176  | 45 | 2.25  | Shc2;C2cd4c                              | Signaling     |
| DMR7:14146001  | 7  | 14146001  | 14148000  | 2000 | 1 | 3.08E-05 | 0.5133531  | 40 | 2     | Notch3;AABR07055864.1                    | Receptor      |
| DMR7:15788001  | 7  | 15788001  | 15789000  | 1000 | 1 | 9.26E-06 | -1.3898374 | 6  | 0.6   | Zfp955a                                  |               |
| DMR7:34191001  | 7  | 34191001  | 34193000  | 2000 | 1 | 6.84E-05 | -1.5978135 | 25 | 1.25  |                                          |               |
| DMR7:63439001  | 7  | 63439001  | 63441000  | 2000 | 1 | 6.06E-05 | -1.067588  | 19 | 0.95  |                                          |               |
| DMR7:86732001  | 7  | 86732001  | 86733000  | 1000 | 1 | 7.65E-05 | 0.8856062  | 5  | 0.5   | AABR07057765.1                           |               |
| DMR7:90431001  | 7  | 90431001  | 90432000  | 1000 | 1 | 3.45E-05 | -1.533918  | 3  | 0.3   | AABR07057844.2                           |               |
| DMR7:92779001  | 7  | 92779001  | 92780000  | 1000 | 1 | 3.45E-05 | -1.6894086 | 9  | 0.9   | Ext1                                     | Metabolism    |
| DMR7:121015001 | 7  | 121015001 | 121016000 | 1000 | 1 | 4.54E-06 | -1.2908038 | 21 | 2.1   | Nptxr                                    |               |
| DMR8:12550001  | 8  | 12550001  | 12551000  | 1000 | 1 | 7.98E-05 | 0.8548214  | 18 | 1.8   |                                          |               |
| DMR8:34723001  | 8  | 34723001  | 34724000  | 1000 | 1 | 8.56E-06 | -2.3229275 | 12 | 1.2   |                                          |               |
| DMR8:37744001  | 8  | 37744001  | 37745000  | 1000 | 1 | 4.25E-05 | -1.4159968 | 9  | 0.9   |                                          |               |
| DMR8:39921001  | 8  | 39921001  | 39922000  | 1000 | 1 | 1.63E-05 | -1.7477194 | 7  | 0.7   |                                          |               |
| DMR8:48901001  | 8  | 48901001  | 48902000  | 1000 | 1 | 7.89E-06 | -1.6507914 | 9  | 0.9   |                                          |               |
| DMR8:52542001  | 8  | 52542001  | 52543000  | 1000 | 1 | 5.83E-05 | 0.8910212  | 14 | 1.4   |                                          |               |
| DMR8:66991001  | 8  | 66991001  | 66992000  | 1000 | 1 | 4.39E-05 | -0.9417272 | 11 | 1.1   |                                          |               |
| DMR8:68685001  | 8  | 68685001  | 68686000  | 1000 | 1 | 2.17E-05 | -1.2194578 | 5  | 0.5   | Smad3                                    | Transcription |
| DMR8:83366001  | 8  | 83366001  | 83367000  | 1000 | 1 | 8.52E-05 | -1.2297248 | 12 | 1.2   | Hcrr2                                    | Receptor      |
| DMR8:85812001  | 8  | 85812001  | 85813000  | 1000 | 1 | 8.18E-05 | -1.3684059 | 15 | 1.5   | Cgas;Mto1                                | Translation   |
| DMR8:106612001 | 8  | 106612001 | 106613000 | 1000 | 1 | 7.12E-06 | 1.069054   | 14 | 1.4   | AABR07071244.1;Mrps22                    | Transcription |
| DMR8:112245001 | 8  | 112245001 | 112248000 | 3000 | 1 | 1.41E-05 | 0.627541   | 94 | 3.133 |                                          |               |
| DMR9:940001    | 9  | 940001    | 941000    | 1000 | 1 | 9.12E-05 | 0.6745749  | 13 | 1.3   |                                          |               |
| DMR9:5340001   | 9  | 5340001   | 5341000   | 1000 | 1 | 4.82E-05 | -1.3587308 | 5  | 0.5   | Slc5a7                                   | Metabolism    |
| DMR9:13800001  | 9  | 13800001  | 13801000  | 1000 | 1 | 2.25E-06 | 0.9751909  | 4  | 0.4   |                                          |               |
| DMR9:27859001  | 9  | 27859001  | 27860000  | 1000 | 1 | 6.67E-05 | -1.3023599 | 8  | 0.8   |                                          |               |
| DMR9:39535001  | 9  | 39535001  | 39536000  | 1000 | 1 | 6.23E-05 | 0.8487706  | 5  | 0.5   | AABR07067310.1;AABR07067310.2;Khdrbs2    | Translation   |
| DMR9:99801001  | 9  | 99801001  | 99802000  | 1000 | 1 | 2.88E-05 | -1.8289451 | 8  | 0.8   | Olr1353                                  |               |
| DMR10:2378001  | 10 | 2378001   | 2379000   | 1000 | 1 | 3.65E-05 | -1.7597547 | 12 | 1.2   |                                          |               |
| DMR10:5752001  | 10 | 5752001   | 5753000   | 1000 | 1 | 9.37E-05 | -1.98542   | 19 | 1.9   |                                          |               |
| DMR10:16869001 | 10 | 16869001  | 16870000  | 1000 | 1 | 5.99E-05 | 0.7732808  | 15 | 1.5   | Ergic1                                   |               |
| DMR10:45418001 | 10 | 45418001  | 45421000  | 3000 | 1 | 3.91E-05 | 0.7834083  | 77 | 2.567 | Obscn                                    | Unknown       |
| DMR10:50970001 | 10 | 50970001  | 50971000  | 1000 | 1 | 4.03E-05 | 0.9272712  | 18 | 1.8   | Hs3st3a1                                 | Metabolism    |
| DMR10:55463001 | 10 | 55463001  | 55464000  | 1000 | 1 | 5.27E-07 | 1.1575045  | 9  | 0.9   |                                          |               |
| DMR10:56650001 | 10 | 56650001  | 56652000  | 2000 | 1 | 5.00E-05 | 0.4695292  | 55 | 2.75  | Dlg4                                     | Unknown       |
| DMR10:67483001 | 10 | 67483001  | 67484000  | 1000 | 1 | 1.68E-05 | -1.7770418 | 23 | 2.3   | Atad5;Tefm;AABR07030108.2;AABR07030108.1 |               |
| DMR10:77624001 | 10 | 77624001  | 77625000  | 1000 | 1 | 9.03E-05 | 0.8673515  | 21 | 2.1   |                                          |               |

|                 |    |           |           |      |   |          |            |     |       |                |                   |
|-----------------|----|-----------|-----------|------|---|----------|------------|-----|-------|----------------|-------------------|
| DMR10:82813001  | 10 | 82813001  | 82815000  | 2000 | 1 | 3.34E-05 | 0.6858434  | 35  | 1.75  | Ppp1r9b;Samd14 | Signaling;Unknown |
| DMR10:101376001 | 10 | 101376001 | 101377000 | 1000 | 1 | 8.63E-05 | -1.3637471 | 10  | 1     |                |                   |
| DMR10:101799001 | 10 | 101799001 | 101801000 | 2000 | 1 | 2.76E-05 | -1.6106999 | 37  | 1.85  | Slc39a11       | Metabolism        |
| DMR10:102735001 | 10 | 102735001 | 102736000 | 1000 | 1 | 1.96E-05 | -1.6953113 | 13  | 1.3   |                |                   |
| DMR10:103701001 | 10 | 103701001 | 103702000 | 1000 | 1 | 9.24E-05 | -1.1247519 | 25  | 2.5   | Rab37          | Signaling         |
| DMR11:26683001  | 11 | 26683001  | 26684000  | 1000 | 1 | 3.46E-05 | -1.3028074 | 8   | 0.8   |                |                   |
| DMR11:30904001  | 11 | 30904001  | 30906000  | 2000 | 1 | 7.17E-05 | 1.2166954  | 34  | 1.7   | Mrap           |                   |
| DMR11:56194001  | 11 | 56194001  | 56195000  | 1000 | 1 | 8.77E-05 | -1.4882229 | 14  | 1.4   |                |                   |
| DMR11:71192001  | 11 | 71192001  | 71193000  | 1000 | 1 | 6.97E-05 | 0.8449002  | 15  | 1.5   | Rubcn          |                   |
| DMR12:34427001  | 12 | 34427001  | 34428000  | 1000 | 1 | 3.89E-05 | -0.8734985 | 9   | 0.9   |                |                   |
| DMR12:35694001  | 12 | 35694001  | 35695000  | 1000 | 1 | 6.37E-05 | -1.1578693 | 10  | 1     |                |                   |
| DMR12:37379001  | 12 | 37379001  | 37380000  | 1000 | 1 | 4.80E-05 | 0.6159133  | 32  | 3.2   | Atp6v0a2       | Metabolism        |
| DMR12:44143001  | 12 | 44143001  | 44144000  | 1000 | 1 | 5.46E-06 | 0.8886716  | 19  | 1.9   | Fbxw8;Tesc     | Signaling         |
| DMR12:49157001  | 12 | 49157001  | 49158000  | 1000 | 1 | 5.88E-05 | 1.1091368  | 17  | 1.7   |                |                   |
| DMR13:84008001  | 13 | 84008001  | 84009000  | 1000 | 1 | 3.07E-05 | -1.5398249 | 15  | 1.5   | Cd247          | Receptor          |
| DMR13:86550001  | 13 | 86550001  | 86553000  | 3000 | 1 | 9.67E-05 | -1.3126842 | 52  | 1.733 |                |                   |
| DMR13:87794001  | 13 | 87794001  | 87795000  | 1000 | 1 | 3.02E-05 | 0.7588865  | 9   | 0.9   |                |                   |
| DMR13:101165001 | 13 | 101165001 | 101166000 | 1000 | 1 | 5.41E-05 | -1.3069313 | 10  | 1     | Ccdc185        |                   |
| DMR14:10480001  | 14 | 10480001  | 10481000  | 1000 | 1 | 7.94E-05 | 0.6929781  | 25  | 2.5   | Helq           | Transcription     |
| DMR14:10887001  | 14 | 10887001  | 10888000  | 1000 | 1 | 5.97E-05 | 0.7143408  | 21  | 2.1   | Sec31a         | Transport         |
| DMR14:37889001  | 14 | 37889001  | 37890000  | 1000 | 1 | 5.72E-05 | 0.8928491  | 22  | 2.2   |                |                   |
| DMR14:84879001  | 14 | 84879001  | 84880000  | 1000 | 1 | 7.44E-05 | -1.2072091 | 8   | 0.8   | Ascc2          |                   |
| DMR14:94812001  | 14 | 94812001  | 94813000  | 1000 | 1 | 3.74E-05 | -0.8141654 | 14  | 1.4   |                |                   |
| DMR14:101988001 | 14 | 101988001 | 101995000 | 7000 | 1 | 5.73E-05 | 1.5158745  | 109 | 1.557 |                |                   |
| DMR14:103021001 | 14 | 103021001 | 103022000 | 1000 | 1 | 7.99E-05 | -1.6811693 | 20  | 2     |                |                   |
| DMR15:11001     | 15 | 11001     | 14000     | 3000 | 1 | 2.05E-05 | -1.1386346 | 25  | 0.833 |                |                   |
| DMR15:7277001   | 15 | 7277001   | 7278000   | 1000 | 1 | 2.15E-05 | -1.4158286 | 4   | 0.4   |                |                   |
| DMR15:83994001  | 15 | 83994001  | 83995000  | 1000 | 1 | 3.40E-05 | -0.9460745 | 6   | 0.6   | AABR07019020.1 |                   |
| DMR15:102125001 | 15 | 102125001 | 102126000 | 1000 | 1 | 9.54E-05 | 0.7987342  | 51  | 5.1   |                |                   |
| DMR16:5127001   | 16 | 5127001   | 5128000   | 1000 | 1 | 1.52E-05 | -2.6143456 | 11  | 1.1   | Cacna2d3       | Transport         |
| DMR16:8044001   | 16 | 8044001   | 8045000   | 1000 | 1 | 9.82E-05 | 0.6732415  | 27  | 2.7   |                |                   |
| DMR16:26168001  | 16 | 26168001  | 26169000  | 1000 | 1 | 6.41E-05 | -1.1483101 | 6   | 0.6   |                |                   |
| DMR16:60052001  | 16 | 60052001  | 60053000  | 1000 | 1 | 9.89E-05 | 0.8229782  | 17  | 1.7   | 5S_rRNA        |                   |
| DMR16:72104001  | 16 | 72104001  | 72105000  | 1000 | 1 | 4.87E-05 | 0.7194447  | 20  | 2     | Adam3a         |                   |
| DMR17:9336001   | 17 | 9336001   | 9337000   | 1000 | 1 | 2.31E-05 | 0.7967367  | 16  | 1.6   | Macroh2a1      |                   |
| DMR17:17022001  | 17 | 17022001  | 17023000  | 1000 | 1 | 3.39E-05 | -1.540872  | 7   | 0.7   |                |                   |
| DMR17:34906001  | 17 | 34906001  | 34907000  | 1000 | 1 | 4.15E-05 | 0.8117999  | 10  | 1     | Irf4           | Transcription     |
| DMR17:43662001  | 17 | 43662001  | 43663000  | 1000 | 1 | 2.49E-05 | -1.4270173 | 11  | 1.1   | Hfe            | Immune            |
| DMR17:50613001  | 17 | 50613001  | 50615000  | 2000 | 1 | 1.71E-05 | -1.057216  | 18  | 0.9   |                |                   |
| DMR17:53305001  | 17 | 53305001  | 53306000  | 1000 | 1 | 9.44E-05 | 0.8166427  | 9   | 0.9   | Hecw1          | Protease          |
| DMR17:77572001  | 17 | 77572001  | 77573000  | 1000 | 1 | 6.08E-05 | 0.8776844  | 10  | 1     | AABR07028615.2 |                   |
| DMR17:77585001  | 17 | 77585001  | 77586000  | 1000 | 1 | 3.85E-05 | 0.547652   | 52  | 5.2   |                |                   |
| DMR17:87182001  | 17 | 87182001  | 87183000  | 1000 | 1 | 7.44E-05 | -1.1739897 | 12  | 1.2   |                |                   |
| DMR18:17022001  | 18 | 17022001  | 17023000  | 1000 | 1 | 4.34E-05 | 1.0116139  | 15  | 1.5   | Fhod3          | Cytoskeleton      |
| DMR18:33290001  | 18 | 33290001  | 33291000  | 1000 | 1 | 3.66E-05 | -1.0579369 | 6   | 0.6   |                |                   |
| DMR18:47299001  | 18 | 47299001  | 47300000  | 1000 | 1 | 2.98E-05 | -1.5525582 | 7   | 0.7   | Ftmt           |                   |
| DMR18:71019001  | 18 | 71019001  | 71020000  | 1000 | 1 | 7.19E-05 | 0.8398504  | 21  | 2.1   | Dym            |                   |
| DMR19:7973001   | 19 | 7973001   | 7974000   | 1000 | 1 | 1.31E-05 | 0.7009797  | 6   | 0.6   |                |                   |
| DMR19:10531001  | 19 | 10531001  | 10533000  | 2000 | 1 | 9.70E-05 | 0.6214301  | 54  | 2.7   | Ccdc102a       |                   |
| DMR19:17286001  | 19 | 17286001  | 17287000  | 1000 | 1 | 3.65E-05 | 0.9859924  | 13  | 1.3   | Aktip          | Proteolysis       |
| DMR19:19497001  | 19 | 19497001  | 19498000  | 1000 | 1 | 2.01E-06 | 0.8307041  | 20  | 2     | Nkd1           | Unknown           |
| DMR19:26432001  | 19 | 26432001  | 26434000  | 2000 | 1 | 2.16E-05 | -1.271258  | 5   | 0.25  |                |                   |
| DMR19:32594001  | 19 | 32594001  | 32595000  | 1000 | 1 | 3.17E-05 | 0.9442314  | 19  | 1.9   |                |                   |
| DMR19:41415001  | 19 | 41415001  | 41417000  | 2000 | 1 | 4.93E-05 | 0.6514825  | 31  | 1.55  |                |                   |
| DMR19:43718001  | 19 | 43718001  | 43719000  | 1000 | 1 | 5.14E-05 | 0.7688835  | 15  | 1.5   | Wdr59          |                   |
| DMR19:46937001  | 19 | 46937001  | 46938000  | 1000 | 1 | 2.46E-05 | -1.0535257 | 14  | 1.4   |                |                   |
| DMR19:49889001  | 19 | 49889001  | 49890000  | 1000 | 1 | 8.24E-05 | 0.9676569  | 24  | 2.4   | Cmip           | Signaling         |

|                |    |          |          |      |   |          |            |    |      |                                                                              |              |
|----------------|----|----------|----------|------|---|----------|------------|----|------|------------------------------------------------------------------------------|--------------|
| DMR20:4901001  | 20 | 4901001  | 4903000  | 2000 | 1 | 8.88E-05 | -1.1158105 | 17 | 0.85 | RT1-CE1;RT1-CE4;RT1-CE7;AABR07044408.1;RT1-CE5;AABR07044408.3;AABR07044408.2 | Immune       |
| DMR20:7362001  | 20 | 7362001  | 7363000  | 1000 | 1 | 8.13E-05 | 0.754523   | 16 | 1.6  | LOC499407;LOC294154                                                          |              |
| DMR20:9544001  | 20 | 9544001  | 9546000  | 2000 | 1 | 1.27E-05 | 1.056815   | 38 | 1.9  | Dnah8                                                                        | Cytoskeleton |
| DMR20:14226001 | 20 | 14226001 | 14227000 | 1000 | 1 | 2.46E-05 | 0.620992   | 22 | 2.2  |                                                                              |              |
| DMR20:21174001 | 20 | 21174001 | 21175000 | 1000 | 1 | 4.74E-05 | -1.509404  | 7  | 0.7  |                                                                              |              |
| DMR20:48960001 | 20 | 48960001 | 48962000 | 2000 | 1 | 6.08E-05 | 0.8286568  | 40 | 2    | AABR07045485.1                                                               |              |

**Supplemental Table S3**  
**DMR Site Table Dioxin Kidney Disease p<1e-04**

| DMR Name       | Chr | Start     | Stop      | Length | # Sig Win | minP     | maxLFC     | CpG # | CpG Density | Gene Annotation       | Gene Category                     |
|----------------|-----|-----------|-----------|--------|-----------|----------|------------|-------|-------------|-----------------------|-----------------------------------|
| DMR1:26609001  | 1   | 26609001  | 26610000  | 1000   | 1         | 9.10E-05 | -1.0668694 | 7     | 0.7         |                       |                                   |
| DMR1:84044001  | 1   | 84044001  | 84045000  | 1000   | 1         | 9.15E-06 | 0.8979562  | 40    | 4           | Itpkc;Coq8b           | Signaling                         |
| DMR1:124314001 | 1   | 124314001 | 124315000 | 1000   | 1         | 5.35E-05 | 0.9251134  | 17    | 1.7         | AABR07004090.1        |                                   |
| DMR1:125588001 | 1   | 125588001 | 125590000 | 2000   | 1         | 5.00E-05 | 0.7041551  | 15    | 0.75        | Fam189a1              | Unknown                           |
| DMR1:126250001 | 1   | 126250001 | 126251000 | 1000   | 1         | 6.44E-05 | 0.590199   | 19    | 1.9         |                       |                                   |
| DMR1:132451001 | 1   | 132451001 | 132452000 | 1000   | 1         | 5.61E-05 | -0.8109381 | 11    | 1.1         |                       |                                   |
| DMR1:140694001 | 1   | 140694001 | 140695000 | 1000   | 1         | 3.04E-06 | 0.4477087  | 8     | 0.8         |                       |                                   |
| DMR1:170619001 | 1   | 170619001 | 170620000 | 1000   | 1         | 3.42E-05 | 0.4007726  | 16    | 1.6         | Dchs1                 | Signaling                         |
| DMR1:225132001 | 1   | 225132001 | 225134000 | 2000   | 1         | 5.17E-05 | -0.6737748 | 36    | 1.8         | B3gat3;Rom1;Eml3;Mta2 | Metabolism;Receptor;Transcription |
| DMR1:240780001 | 1   | 240780001 | 240781000 | 1000   | 1         | 1.94E-05 | -0.9969527 | 4     | 0.4         | AABR07006576.1        |                                   |
| DMR1:266481001 | 1   | 266481001 | 266482000 | 1000   | 1         | 3.79E-05 | 0.7170932  | 15    | 1.5         | As3mt                 | Epigenetic                        |
| DMR1:280039001 | 1   | 280039001 | 280040000 | 1000   | 1         | 1.64E-05 | 0.8587304  | 10    | 1           |                       |                                   |
| DMR2:18655001  | 2   | 18655001  | 18656000  | 1000   | 1         | 4.33E-05 | 0.6378092  | 14    | 1.4         |                       |                                   |
| DMR2:52668001  | 2   | 52668001  | 52670000  | 2000   | 1         | 5.76E-05 | 0.4478987  | 16    | 0.8         | AABR07008300.1        |                                   |
| DMR2:63478001  | 2   | 63478001  | 63479000  | 1000   | 1         | 3.37E-05 | -1.0540635 | 5     | 0.5         |                       |                                   |
| DMR2:102108001 | 2   | 102108001 | 102109000 | 1000   | 1         | 6.03E-05 | -1.1037772 | 9     | 0.9         |                       |                                   |
| DMR2:169344001 | 2   | 169344001 | 169345000 | 1000   | 1         | 6.83E-05 | 0.4951528  | 39    | 3.9         |                       |                                   |
| DMR2:172033001 | 2   | 172033001 | 172034000 | 1000   | 1         | 9.26E-06 | 0.7783473  | 8     | 0.8         |                       |                                   |
| DMR2:180603001 | 2   | 180603001 | 180604000 | 1000   | 1         | 4.43E-05 | -1.0366432 | 8     | 0.8         |                       |                                   |
| DMR2:214851001 | 2   | 214851001 | 214853000 | 2000   | 1         | 8.62E-05 | -1.1453177 | 13    | 0.65        |                       |                                   |
| DMR2:235482001 | 2   | 235482001 | 235483000 | 1000   | 1         | 2.35E-05 | -0.9539306 | 9     | 0.9         |                       |                                   |
| DMR2:236087001 | 2   | 236087001 | 236088000 | 1000   | 1         | 7.88E-05 | -1.3103349 | 16    | 1.6         |                       |                                   |
| DMR2:252212001 | 2   | 252212001 | 252213000 | 1000   | 1         | 6.51E-05 | -1.1673649 | 17    | 1.7         |                       |                                   |
| DMR3:28555001  | 3   | 28555001  | 28556000  | 1000   | 1         | 2.12E-06 | -1.2090725 | 8     | 0.8         | Kynu                  | Metabolism                        |
| DMR3:56882001  | 3   | 56882001  | 56883000  | 1000   | 1         | 6.86E-05 | 0.6469804  | 10    | 1           | Gad1                  | Metabolism                        |
| DMR3:63062001  | 3   | 63062001  | 63063000  | 1000   | 1         | 2.50E-05 | -0.9551486 | 10    | 1           | Pde11a                | Signaling                         |
| DMR3:100895001 | 3   | 100895001 | 100896000 | 1000   | 1         | 7.32E-05 | -1.0732416 | 7     | 0.7         |                       |                                   |
| DMR3:110391001 | 3   | 110391001 | 110392000 | 1000   | 1         | 3.01E-07 | 0.6017783  | 10    | 1           | Bub1b                 | Signaling                         |
| DMR3:142606001 | 3   | 142606001 | 142607000 | 1000   | 1         | 7.48E-05 | -1.2537515 | 12    | 1.2         |                       |                                   |
| DMR3:153119001 | 3   | 153119001 | 153120000 | 1000   | 1         | 5.81E-05 | -0.7280792 | 10    | 1           | Dsn1;Soga1            |                                   |
| DMR4:7546001   | 4   | 7546001   | 7547000   | 1000   | 1         | 2.59E-07 | -1.4480138 | 8     | 0.8         | Klhl7                 | Cytoskeleton                      |
| DMR4:24067001  | 4   | 24067001  | 24068000  | 1000   | 1         | 9.90E-05 | -0.8048194 | 13    | 1.3         |                       |                                   |
| DMR4:32091001  | 4   | 32091001  | 32092000  | 1000   | 1         | 3.83E-05 | -1.4474116 | 20    | 2           | Sem1                  |                                   |
| DMR4:46747001  | 4   | 46747001  | 46748000  | 1000   | 1         | 3.63E-05 | -0.8944453 | 4     | 0.4         |                       |                                   |
| DMR4:70909001  | 4   | 70909001  | 70910000  | 1000   | 1         | 5.00E-05 | 0.6911003  | 7     | 0.7         | Ephb6;Trpv6           | Receptor;Transport                |
| DMR4:106155001 | 4   | 106155001 | 106156000 | 1000   | 1         | 5.56E-05 | 0.6315392  | 3     | 0.3         |                       |                                   |
| DMR4:170225001 | 4   | 170225001 | 170226000 | 1000   | 1         | 1.31E-05 | -0.7054187 | 14    | 1.4         |                       |                                   |
| DMR5:25329001  | 5   | 25329001  | 25330000  | 1000   | 1         | 6.00E-07 | -1.3752165 | 13    | 1.3         | AABR07047256.1        |                                   |
| DMR5:60116001  | 5   | 60116001  | 60117000  | 1000   | 1         | 5.40E-05 | 0.7205939  | 24    | 2.4         | Pax5                  | Transcription                     |
| DMR5:60993001  | 5   | 60993001  | 60994000  | 1000   | 1         | 7.94E-05 | 0.568824   | 18    | 1.8         | Shb                   |                                   |
| DMR5:76216001  | 5   | 76216001  | 76218000  | 2000   | 1         | 1.92E-06 | 0.6730518  | 24    | 1.2         |                       |                                   |
| DMR5:82375001  | 5   | 82375001  | 82376000  | 1000   | 1         | 5.30E-05 | 0.6917963  | 4     | 0.4         |                       |                                   |
| DMR5:88560001  | 5   | 88560001  | 88561000  | 1000   | 1         | 2.31E-05 | -0.9680956 | 7     | 0.7         | Tle1                  | Transcription                     |
| DMR5:124311001 | 5   | 124311001 | 124315000 | 4000   | 1         | 2.32E-05 | -0.9622749 | 53    | 1.325       | C8b                   | Immune                            |
| DMR5:134947001 | 5   | 134947001 | 134948000 | 1000   | 1         | 7.19E-05 | -1.2037754 | 21    | 2.1         | Lrrc41;Rad54l         | Development;DNA Repair            |
| DMR5:146038001 | 5   | 146038001 | 146039000 | 1000   | 1         | 8.40E-05 | 0.613032   | 10    | 1           | LOC682102             |                                   |
| DMR5:156789001 | 5   | 156789001 | 156790000 | 1000   | 1         | 3.05E-05 | -0.8969006 | 12    | 1.2         | Cda                   | Metabolism                        |
| DMR5:159978001 | 5   | 159978001 | 159980000 | 2000   | 1         | 8.51E-05 | -0.7568103 | 22    | 1.1         | Hspb7;AC120594.1      | Protein Binding                   |
| DMR6:11021001  | 6   | 11021001  | 11022000  | 1000   | 1         | 1.42E-05 | -1.346316  | 20    | 2           | Ttc7a;Stpg4           | Metabolism                        |
| DMR6:31546001  | 6   | 31546001  | 31547000  | 1000   | 1         | 1.06E-05 | -1.2093988 | 5     | 0.5         |                       |                                   |
| DMR6:36034001  | 6   | 36034001  | 36035000  | 1000   | 1         | 7.75E-05 | 0.5688776  | 6     | 0.6         |                       |                                   |
| DMR6:43292001  | 6   | 43292001  | 43294000  | 2000   | 1         | 2.81E-06 | 0.8762856  | 31    | 1.55        | Asap2                 | Development                       |
| DMR6:66500001  | 6   | 66500001  | 66501000  | 1000   | 1         | 7.59E-05 | -0.9188226 | 13    | 1.3         |                       |                                   |
| DMR6:92517001  | 6   | 92517001  | 92518000  | 1000   | 1         | 2.75E-05 | 0.8847375  | 15    | 1.5         | Nin                   | Transcription                     |
| DMR6:102160001 | 6   | 102160001 | 102161000 | 1000   | 1         | 8.09E-06 | 0.8496351  | 6     | 0.6         | Tmem229b              | Unknown                           |
| DMR6:133271001 | 6   | 133271001 | 133272000 | 1000   | 1         | 2.47E-06 | -0.8565883 | 8     | 0.8         |                       |                                   |
| DMR7:36842001  | 7   | 36842001  | 36843000  | 1000   | 1         | 1.05E-05 | -1.1184397 | 13    | 1.3         |                       |                                   |
| DMR7:124601001 | 7   | 124601001 | 124602000 | 1000   | 1         | 5.71E-05 | -0.9305081 | 20    | 2           | Scube1                | Signaling                         |
| DMR7:125786001 | 7   | 125786001 | 125787000 | 1000   | 1         | 4.09E-06 | 0.918443   | 15    | 1.5         | Arhgap8               | Signaling                         |
| DMR8:22951001  | 8   | 22951001  | 22952000  | 1000   | 1         | 2.45E-05 | -0.8579528 | 36    | 3.6         | Ccdc159;Plppr2        |                                   |
| DMR8:56618001  | 8   | 56618001  | 56619000  | 1000   | 1         | 1.22E-05 | 0.7703794  | 13    | 1.3         | Rdx                   |                                   |
| DMR8:79728001  | 8   | 79728001  | 79729000  | 1000   | 1         | 7.92E-05 | 0.6960078  | 3     | 0.3         | Rab27a                | Signaling                         |
| DMR8:113915001 | 8   | 113915001 | 113916000 | 1000   | 1         | 9.96E-05 | -0.8132934 | 13    | 1.3         | Nek11                 | Signaling                         |
| DMR8:115058001 | 8   | 115058001 | 115059000 | 1000   | 1         | 9.42E-06 | 0.6181724  | 15    | 1.5         | Poc1a                 | Unknown                           |

|                 |    |           |           |      |   |          |            |    |       |                           |                                   |
|-----------------|----|-----------|-----------|------|---|----------|------------|----|-------|---------------------------|-----------------------------------|
| DMR8:121448001  | 8  | 121448001 | 121449000 | 1000 | 1 | 8.81E-05 | 0.4337188  | 20 | 2     | LOC102554058              |                                   |
| DMR8:132993001  | 8  | 132993001 | 132994000 | 1000 | 1 | 9.60E-05 | -0.8242835 | 5  | 0.5   | Ccr1                      | Receptor                          |
| DMR9:18006001   | 9  | 18006001  | 18008000  | 2000 | 1 | 9.71E-05 | -0.79795   | 42 | 2.1   | AABR07066826.2            |                                   |
| DMR9:119663001  | 9  | 119663001 | 119665000 | 2000 | 1 | 5.88E-05 | 0.5382302  | 27 | 1.35  | Emilin2                   | Extracellular Matrix              |
| DMR10:4705001   | 10 | 4705001   | 4706000   | 1000 | 1 | 3.08E-05 | 0.527484   | 21 | 2.1   |                           |                                   |
| DMR10:29359001  | 10 | 29359001  | 29360000  | 1000 | 1 | 2.84E-05 | -1.1587569 | 15 | 1.5   | Ttc1                      |                                   |
| DMR10:45231001  | 10 | 45231001  | 45232000  | 1000 | 1 | 8.12E-05 | -0.9022424 | 18 | 1.8   | Zfp39                     | Transcription                     |
| DMR10:50198001  | 10 | 50198001  | 50199000  | 1000 | 1 | 7.09E-05 | -0.5583542 | 14 | 1.4   | U6                        |                                   |
| DMR10:53948001  | 10 | 53948001  | 53949000  | 1000 | 1 | 8.39E-05 | -0.7201867 | 7  | 0.7   |                           |                                   |
| DMR10:65525001  | 10 | 65525001  | 65526000  | 1000 | 1 | 8.19E-06 | -0.9754486 | 9  | 0.9   | Sdf2;RGD1307929           | Growth Factors & Cytokines        |
| DMR10:67383001  | 10 | 67383001  | 67386000  | 3000 | 1 | 8.46E-05 | 0.8325244  | 44 | 1.467 | Crif3                     |                                   |
| DMR10:78519001  | 10 | 78519001  | 78522000  | 3000 | 1 | 4.14E-05 | -0.9647653 | 25 | 0.833 |                           |                                   |
| DMR10:87975001  | 10 | 87975001  | 87976000  | 1000 | 1 | 9.94E-05 | 0.6869797  | 8  | 0.8   |                           |                                   |
| DMR11:1053001   | 11 | 1053001   | 1054000   | 1000 | 1 | 4.48E-05 | -0.7164864 | 9  | 0.9   |                           |                                   |
| DMR11:29630001  | 11 | 29630001  | 29631000  | 1000 | 1 | 8.44E-05 | 0.8628979  | 8  | 0.8   | AABR07033607.1;Krtap7-1   |                                   |
| DMR11:34484001  | 11 | 34484001  | 34485000  | 1000 | 1 | 6.03E-05 | 0.6461649  | 29 | 2.9   | Hlcs                      | Metabolism                        |
| DMR12:11489001  | 12 | 11489001  | 11490000  | 1000 | 1 | 9.80E-05 | -0.8474675 | 12 | 1.2   | Smurf1                    | Metabolism                        |
| DMR12:15432001  | 12 | 15432001  | 15433000  | 1000 | 1 | 1.86E-07 | 0.6253055  | 11 | 1.1   |                           |                                   |
| DMR12:22015001  | 12 | 22015001  | 22016000  | 1000 | 1 | 8.18E-05 | 0.8713572  | 9  | 0.9   | LOC100362783;LOC102550456 | Transcription                     |
| DMR12:51224001  | 12 | 51224001  | 51226000  | 2000 | 1 | 5.73E-05 | -0.9326674 | 28 | 1.4   | Mn1                       | Unknown                           |
| DMR13:51419001  | 13 | 51419001  | 51420000  | 1000 | 1 | 5.91E-05 | 0.6426144  | 17 | 1.7   | Kdm5b                     | Transcription                     |
| DMR13:51630001  | 13 | 51630001  | 51631000  | 1000 | 1 | 8.40E-05 | 0.9200432  | 18 | 1.8   | Ppp1r12b                  | Signaling                         |
| DMR13:65108001  | 13 | 65108001  | 65109000  | 1000 | 1 | 2.24E-05 | -0.9161897 | 10 | 1     |                           |                                   |
| DMR13:69459001  | 13 | 69459001  | 69460000  | 1000 | 1 | 4.37E-05 | 0.533714   | 9  | 0.9   |                           |                                   |
| DMR13:74408001  | 13 | 74408001  | 74409000  | 1000 | 1 | 1.28E-05 | -0.9206737 | 19 | 1.9   | Angptl1                   | Growth Factors & Cytokines        |
| DMR13:95062001  | 13 | 95062001  | 95063000  | 1000 | 1 | 7.58E-05 | 0.6259175  | 15 | 1.5   | Sdccag8                   |                                   |
| DMR13:100390001 | 13 | 100390001 | 100391000 | 1000 | 1 | 4.07E-05 | -0.92745   | 12 | 1.2   | Enah                      | Signaling                         |
| DMR13:107191001 | 13 | 107191001 | 107192000 | 1000 | 1 | 7.18E-05 | -0.9321302 | 10 | 1     | Ush2a                     | Extracellular Matrix              |
| DMR14:6246001   | 14 | 6246001   | 6247000   | 1000 | 1 | 6.86E-05 | -0.7497525 | 25 | 2.5   |                           |                                   |
| DMR14:18628001  | 14 | 18628001  | 18629000  | 1000 | 1 | 3.06E-05 | 0.7055066  | 11 | 1.1   | Epgn                      | Signaling                         |
| DMR14:37087001  | 14 | 37087001  | 37088000  | 1000 | 1 | 6.18E-05 | -1.116355  | 6  | 0.6   | Spata18                   |                                   |
| DMR14:39797001  | 14 | 39797001  | 39798000  | 1000 | 1 | 4.23E-05 | -1.1535159 | 13 | 1.3   | Gabra2                    | Receptor                          |
| DMR15:418001    | 15 | 418001    | 419000    | 1000 | 1 | 4.49E-05 | -0.7227506 | 12 | 1.2   | Kcnma1                    | Metabolism                        |
| DMR15:25195001  | 15 | 25195001  | 25196000  | 1000 | 1 | 6.33E-05 | -0.8698756 | 14 | 1.4   |                           |                                   |
| DMR15:45766001  | 15 | 45766001  | 45767000  | 1000 | 1 | 9.89E-05 | 0.7458036  | 8  | 0.8   | Fam124a                   |                                   |
| DMR16:187001    | 16 | 187001    | 188000    | 1000 | 1 | 3.13E-05 | -1.0072488 | 6  | 0.6   |                           |                                   |
| DMR16:1252001   | 16 | 1252001   | 1253000   | 1000 | 1 | 2.16E-06 | -1.0653278 | 8  | 0.8   |                           |                                   |
| DMR16:4122001   | 16 | 4122001   | 4123000   | 1000 | 1 | 3.04E-05 | -0.9859247 | 11 | 1.1   |                           |                                   |
| DMR16:6606001   | 16 | 6606001   | 6607000   | 1000 | 1 | 5.96E-05 | -0.7080445 | 10 | 1     | U6;Tkt                    | Metabolism                        |
| DMR16:7384001   | 16 | 7384001   | 7386000   | 2000 | 1 | 2.61E-05 | -0.923171  | 36 | 1.8   | Dnah1                     | Cytoskeleton                      |
| DMR16:51299001  | 16 | 51299001  | 51300000  | 1000 | 1 | 3.52E-05 | -0.9551617 | 3  | 0.3   |                           |                                   |
| DMR16:52005001  | 16 | 52005001  | 52006000  | 1000 | 1 | 1.14E-05 | -0.8979299 | 14 | 1.4   |                           |                                   |
| DMR16:72705001  | 16 | 72705001  | 72707000  | 2000 | 1 | 3.88E-05 | 0.688901   | 13 | 0.65  | AABR07026339.1            |                                   |
| DMR16:81490001  | 16 | 81490001  | 81491000  | 1000 | 1 | 1.99E-05 | 0.7333776  | 17 | 1.7   | LOC688801;Cdc16           | Metabolism                        |
| DMR17:1014001   | 17 | 1014001   | 1015000   | 1000 | 1 | 4.08E-08 | -1.2320279 | 9  | 0.9   |                           |                                   |
| DMR17:8125001   | 17 | 8125001   | 8126000   | 1000 | 1 | 3.62E-05 | -0.7171551 | 23 | 2.3   | AABR07026975.1;Trpc7      | Transport                         |
| DMR17:40406001  | 17 | 40406001  | 40407000  | 1000 | 1 | 3.62E-05 | -1.2567487 | 7  | 0.7   |                           |                                   |
| DMR17:51269001  | 17 | 51269001  | 51270000  | 1000 | 1 | 1.76E-05 | 0.5704818  | 18 | 1.8   |                           |                                   |
| DMR17:52298001  | 17 | 52298001  | 52299000  | 1000 | 1 | 4.00E-05 | -0.9260444 | 9  | 0.9   | Gli3                      | Transcription                     |
| DMR18:27362001  | 18 | 27362001  | 27363000  | 1000 | 1 | 9.47E-05 | 0.5067268  | 10 | 1     | Nme5                      | Signaling                         |
| DMR18:33319001  | 18 | 33319001  | 33320000  | 1000 | 1 | 5.74E-05 | -0.9611238 | 6  | 0.6   |                           |                                   |
| DMR18:34960001  | 18 | 34960001  | 34961000  | 1000 | 1 | 7.17E-05 | -0.8962104 | 7  | 0.7   |                           |                                   |
| DMR18:65204001  | 18 | 65204001  | 65205000  | 1000 | 1 | 8.63E-06 | 0.4870311  | 20 | 2     | Tcf4                      | Transcription                     |
| DMR18:71015001  | 18 | 71015001  | 71016000  | 1000 | 1 | 7.92E-05 | 0.4915763  | 16 | 1.6   | Dym                       |                                   |
| DMR18:78306001  | 18 | 78306001  | 78308000  | 2000 | 1 | 3.31E-06 | 0.5489711  | 42 | 2.1   |                           |                                   |
| DMR19:19479001  | 19 | 19479001  | 19480000  | 1000 | 1 | 3.49E-05 | -0.9693046 | 15 | 1.5   | Nkd1                      | Unknown                           |
| DMR19:23137001  | 19 | 23137001  | 23138000  | 1000 | 1 | 3.29E-05 | -0.7011565 | 16 | 1.6   |                           |                                   |
| DMR19:42276001  | 19 | 42276001  | 42277000  | 1000 | 1 | 2.51E-05 | -0.7319936 | 23 | 2.3   |                           |                                   |
| DMR20:3581001   | 20 | 3581001   | 3583000   | 2000 | 1 | 8.74E-05 | -1.2396762 | 52 | 2.6   | Ddr1;Gtf2h4;Vars2         | Receptor;Transcription;Metabolism |
| DMR20:6765001   | 20 | 6765001   | 6768000   | 3000 | 1 | 2.51E-05 | 0.4652484  | 50 | 1.667 | Ppil1;Grm4                | Immune;Receptor                   |
| DMR20:17218001  | 20 | 17218001  | 17219000  | 1000 | 1 | 2.96E-05 | 0.6009305  | 11 | 1.1   | AABR07044685.1            |                                   |
| DMR20:18719001  | 20 | 18719001  | 18720000  | 1000 | 1 | 3.56E-05 | 0.5259929  | 13 | 1.3   |                           |                                   |
| DMR20:22720001  | 20 | 22720001  | 22721000  | 1000 | 1 | 8.73E-05 | -1.1159126 | 13 | 1.3   | Nrbf2                     | Transcription                     |
| DMR20:25866001  | 20 | 25866001  | 25867000  | 1000 | 1 | 8.79E-05 | 0.4824531  | 3  | 0.3   |                           |                                   |
| DMR20:31154001  | 20 | 31154001  | 31155000  | 1000 | 1 | 9.66E-05 | -1.1432767 | 13 | 1.3   | Lrrc20                    | Development                       |
| DMRX:98857001   | X  | 98857001  | 98858000  | 1000 | 1 | 5.06E-05 | -1.3956284 | 17 | 1.7   |                           |                                   |



**Supplemental Table S4**  
**DMR Site Table Dioxin Obesity p<1e-04**

| DMR Name       | Chr | Start     | Stop      | Length | # Sig Win | minP     | maxLFC     | CpG # | CpG Density | Gene Annotation      | Gene Category              |
|----------------|-----|-----------|-----------|--------|-----------|----------|------------|-------|-------------|----------------------|----------------------------|
| DMR1:3401001   | 1   | 3401001   | 3402000   | 1000   | 1         | 6.15E-05 | 0.9783637  | 12    | 1.2         |                      |                            |
| DMR1:14860001  | 1   | 14860001  | 14861000  | 1000   | 1         | 5.26E-05 | -1.2963118 | 14    | 1.4         |                      |                            |
| DMR1:16304001  | 1   | 16304001  | 16305000  | 1000   | 1         | 4.69E-07 | -0.9283369 | 21    | 2.1         |                      |                            |
| DMR1:47479001  | 1   | 47479001  | 47480000  | 1000   | 1         | 6.09E-05 | -0.9983844 | 9     | 0.9         | Rsph3                | Cytoskeleton               |
| DMR1:49230001  | 1   | 49230001  | 49231000  | 1000   | 1         | 9.75E-05 | -1.2444418 | 18    | 1.8         |                      |                            |
| DMR1:51555001  | 1   | 51555001  | 51556000  | 1000   | 1         | 6.78E-05 | -1.07467   | 15    | 1.5         |                      |                            |
| DMR1:63597001  | 1   | 63597001  | 63598000  | 1000   | 1         | 7.59E-05 | -0.9654681 | 13    | 1.3         |                      |                            |
| DMR1:69371001  | 1   | 69371001  | 69372000  | 1000   | 1         | 5.89E-06 | -1.0121788 | 7     | 0.7         | Nlrp4a               | Apoptosis                  |
| DMR1:77584001  | 1   | 77584001  | 77585000  | 1000   | 1         | 9.61E-05 | 0.6001781  | 10    | 1           |                      |                            |
| DMR1:127527001 | 1   | 127527001 | 127528000 | 1000   | 1         | 2.92E-05 | -1.3949983 | 9     | 0.9         |                      |                            |
| DMR1:142925001 | 1   | 142925001 | 142926000 | 1000   | 1         | 7.79E-05 | -1.1759702 | 19    | 1.9         | Alpk3                | Cytoskeleton               |
| DMR1:162905001 | 1   | 162905001 | 162906000 | 1000   | 1         | 2.81E-05 | 0.8501194  | 9     | 0.9         | Gdpd4                | Metabolism                 |
| DMR1:162916001 | 1   | 162916001 | 162917000 | 1000   | 1         | 4.50E-05 | -1.3887864 | 9     | 0.9         | Gdpd4                | Metabolism                 |
| DMR1:173752001 | 1   | 173752001 | 173753000 | 1000   | 1         | 5.10E-05 | -1.419636  | 14    | 1.4         | Lmo1                 | Transcription              |
| DMR1:188001001 | 1   | 188001001 | 188002000 | 1000   | 1         | 2.46E-05 | 1.1514938  | 4     | 0.4         |                      |                            |
| DMR1:189380001 | 1   | 189380001 | 189381000 | 1000   | 1         | 2.46E-05 | -1.2767454 | 5     | 0.5         | Acsm2                | Metabolism                 |
| DMR1:190818001 | 1   | 190818001 | 190819000 | 1000   | 1         | 1.34E-05 | 0.770539   | 11    | 1.1         | Eef2k                | Signaling                  |
| DMR1:221864001 | 1   | 221864001 | 221865000 | 1000   | 1         | 2.23E-05 | -0.8796939 | 31    | 3.1         | Nrxn2                | Receptor                   |
| DMR1:242139001 | 1   | 242139001 | 242140000 | 1000   | 1         | 1.56E-05 | 0.8604877  | 9     | 0.9         | Fxn                  | Metabolism                 |
| DMR1:250563001 | 1   | 250563001 | 250564000 | 1000   | 1         | 5.84E-05 | -1.2345673 | 18    | 1.8         | Asah2                | Metabolism                 |
| DMR1:264836001 | 1   | 264836001 | 264837000 | 1000   | 1         | 5.56E-05 | 0.5252496  | 10    | 1           | Kazald1              | Epigenetic                 |
| DMR1:277076001 | 1   | 277076001 | 277077000 | 1000   | 1         | 1.30E-05 | -1.3153924 | 17    | 1.7         | Habp2                | Protease                   |
| DMR2:38100001  | 2   | 38100001  | 38101000  | 1000   | 1         | 7.03E-05 | -1.5348596 | 14    | 1.4         | Ipo11                | Transport                  |
| DMR2:43315001  | 2   | 43315001  | 43317000  | 2000   | 1         | 8.14E-06 | 0.7576591  | 30    | 1.5         |                      |                            |
| DMR2:121962001 | 2   | 121962001 | 121963000 | 1000   | 1         | 1.27E-05 | 0.720486   | 15    | 1.5         |                      |                            |
| DMR2:142597001 | 2   | 142597001 | 142598000 | 1000   | 1         | 7.84E-06 | -1.3877118 | 6     | 0.6         |                      |                            |
| DMR2:143732001 | 2   | 143732001 | 143733000 | 1000   | 1         | 9.19E-05 | -1.4102388 | 6     | 0.6         |                      |                            |
| DMR2:144540001 | 2   | 144540001 | 144541000 | 1000   | 1         | 1.20E-05 | -1.291534  | 9     | 0.9         | Spart                |                            |
| DMR2:203849001 | 2   | 203849001 | 203850000 | 1000   | 1         | 2.55E-05 | 0.5047372  | 13    | 1.3         | Igfs3                | Immune                     |
| DMR2:228663001 | 2   | 228663001 | 228664000 | 1000   | 1         | 4.40E-05 | 0.9771674  | 13    | 1.3         | RGD1306519           |                            |
| DMR2:242685001 | 2   | 242685001 | 242686000 | 1000   | 1         | 3.20E-05 | -1.9203933 | 25    | 2.5         | Emcn                 | Development                |
| DMR2:251832001 | 2   | 251832001 | 251833000 | 1000   | 1         | 1.42E-05 | -1.0511953 | 15    | 1.5         | RGD1560065;U5        |                            |
| DMR2:263427001 | 2   | 263427001 | 263428000 | 1000   | 1         | 7.86E-05 | -1.5214865 | 10    | 1           | Negr1                | Growth Factors & Cytokines |
| DMR3:3387001   | 3   | 3387001   | 3388000   | 1000   | 1         | 1.34E-05 | -1.3536512 | 21    | 2.1         | Camsap1;LOC100360117 |                            |
| DMR3:7357001   | 3   | 7357001   | 7359000   | 2000   | 1         | 1.92E-05 | 0.5871627  | 26    | 1.3         | Ak8                  |                            |
| DMR3:23233001  | 3   | 23233001  | 23234000  | 1000   | 1         | 5.83E-05 | -1.7113201 | 13    | 1.3         | Olfml2a              | Receptor                   |
| DMR3:25730001  | 3   | 25730001  | 25732000  | 2000   | 1         | 1.24E-05 | 0.8741131  | 12    | 0.6         |                      |                            |
| DMR3:27976001  | 3   | 27976001  | 27977000  | 1000   | 1         | 7.60E-05 | -1.8349549 | 13    | 1.3         |                      |                            |
| DMR3:80265001  | 3   | 80265001  | 80266000  | 1000   | 1         | 3.12E-05 | -1.2802035 | 13    | 1.3         | RGD1309540           | Unknown                    |
| DMR3:82040001  | 3   | 82040001  | 82041000  | 1000   | 1         | 7.08E-05 | -1.2092724 | 15    | 1.5         |                      |                            |
| DMR3:115465001 | 3   | 115465001 | 115466000 | 1000   | 1         | 7.43E-06 | 0.9939477  | 4     | 0.4         |                      |                            |
| DMR3:116550001 | 3   | 116550001 | 116551000 | 1000   | 1         | 7.14E-05 | 0.7002186  | 8     | 0.8         |                      |                            |
| DMR3:153374001 | 3   | 153374001 | 153375000 | 1000   | 1         | 9.32E-05 | -1.6191746 | 14    | 1.4         | Mroh8                |                            |
| DMR3:169986001 | 3   | 169986001 | 169988000 | 2000   | 1         | 8.70E-05 | -1.3701335 | 27    | 1.35        |                      |                            |
| DMR4:29707001  | 4   | 29707001  | 29708000  | 1000   | 1         | 4.17E-05 | -1.4515404 | 14    | 1.4         |                      |                            |
| DMR4:38146001  | 4   | 38146001  | 38147000  | 1000   | 1         | 4.95E-05 | -1.5695442 | 9     | 0.9         |                      |                            |
| DMR4:74446001  | 4   | 74446001  | 74447000  | 1000   | 1         | 5.27E-05 | -0.9889342 | 12    | 1.2         |                      |                            |
| DMR4:81764001  | 4   | 81764001  | 81765000  | 1000   | 1         | 4.88E-05 | -0.8825113 | 22    | 2.2         |                      |                            |
| DMR4:120994001 | 4   | 120994001 | 120995000 | 1000   | 1         | 3.31E-05 | 0.9115423  | 5     | 0.5         | LOC102555094         |                            |
| DMR4:127078001 | 4   | 127078001 | 127080000 | 2000   | 1         | 5.92E-05 | -1.1364687 | 11    | 0.55        |                      |                            |
| DMR4:131575001 | 4   | 131575001 | 131577000 | 2000   | 1         | 8.57E-05 | 0.7925424  | 28    | 1.4         | Foxp1                | Transcription              |
| DMR4:135682001 | 4   | 135682001 | 135683000 | 1000   | 1         | 6.55E-05 | -1.0303245 | 8     | 0.8         |                      |                            |
| DMR4:160839001 | 4   | 160839001 | 160840000 | 1000   | 1         | 1.64E-05 | -1.4243264 | 16    | 1.6         |                      |                            |
| DMR4:166919001 | 4   | 166919001 | 166920000 | 1000   | 1         | 8.39E-05 | 0.62768    | 8     | 0.8         | Tas2r124;Tas2r102    |                            |
| DMR4:171235001 | 4   | 171235001 | 171236000 | 1000   | 1         | 9.12E-07 | -1.099421  | 30    | 3           |                      |                            |
| DMR4:177526001 | 4   | 177526001 | 177527000 | 1000   | 1         | 1.30E-05 | -1.1902675 | 16    | 1.6         |                      |                            |
| DMR5:12232001  | 5   | 12232001  | 12233000  | 1000   | 1         | 9.35E-05 | -1.0578103 | 12    | 1.2         |                      |                            |
| DMR5:20004001  | 5   | 20004001  | 20005000  | 1000   | 1         | 9.21E-05 | 0.5793856  | 15    | 1.5         | Tox                  | Immune                     |
| DMR5:21906001  | 5   | 21906001  | 21907000  | 1000   | 1         | 2.16E-05 | -1.4198234 | 17    | 1.7         | Chd7                 | Epigenetic                 |
| DMR5:23067001  | 5   | 23067001  | 23068000  | 1000   | 1         | 2.15E-05 | -1.3919683 | 13    | 1.3         | Gdf6;AABR07047191.1  | Signaling                  |

|                 |    |           |           |      |   |          |            |    |      |                      |                            |
|-----------------|----|-----------|-----------|------|---|----------|------------|----|------|----------------------|----------------------------|
| DMR5:32490001   | 5  | 32490001  | 32491000  | 1000 | 1 | 2.93E-05 | -1.4975727 | 3  | 0.3  | U7                   |                            |
| DMR5:43982001   | 5  | 43982001  | 43983000  | 1000 | 1 | 1.73E-05 | -1.3807763 | 10 | 1    |                      |                            |
| DMR5:48087001   | 5  | 48087001  | 48088000  | 1000 | 1 | 4.18E-05 | -1.2961709 | 11 | 1.1  | Ankrd6               |                            |
| DMR5:81496001   | 5  | 81496001  | 81498000  | 2000 | 1 | 2.05E-06 | 0.711995   | 22 | 1.1  | Astn2                | Unknown                    |
| DMR5:116990001  | 5  | 116990001 | 116991000 | 1000 | 1 | 8.62E-05 | -1.8831947 | 9  | 0.9  | Tm2d1                | Unknown                    |
| DMR5:126485001  | 5  | 126485001 | 126486000 | 1000 | 1 | 2.20E-05 | -1.0059322 | 9  | 0.9  |                      |                            |
| DMR5:128274001  | 5  | 128274001 | 128275000 | 1000 | 1 | 9.09E-05 | -1.6296792 | 30 | 3    | Zfyve9               | Transcription              |
| DMR5:148155001  | 5  | 148155001 | 148156000 | 1000 | 1 | 2.50E-05 | 0.7757031  | 25 | 2.5  |                      |                            |
| DMR5:161776001  | 5  | 161776001 | 161778000 | 2000 | 1 | 1.10E-06 | -1.4300601 | 19 | 0.95 | Prdm2                | Transcription              |
| DMR5:170488001  | 5  | 170488001 | 170489000 | 1000 | 1 | 1.77E-05 | 0.6385373  | 29 | 2.9  |                      |                            |
| DMR5:171879001  | 5  | 171879001 | 171880000 | 1000 | 1 | 1.78E-05 | 0.7903407  | 30 | 3    |                      |                            |
| DMR6:2601001    | 6  | 2601001   | 2602000   | 1000 | 1 | 5.06E-05 | 0.8257887  | 5  | 0.5  | Atl2                 | Signaling                  |
| DMR6:36808001   | 6  | 36808001  | 36809000  | 1000 | 1 | 6.26E-05 | -1.2186526 | 6  | 0.6  | Kcnc3                |                            |
| DMR6:55665001   | 6  | 55665001  | 55666000  | 1000 | 1 | 7.98E-05 | -1.4621893 | 13 | 1.3  | Ankmy2               |                            |
| DMR6:75282001   | 6  | 75282001  | 75283000  | 1000 | 1 | 6.81E-05 | -1.1769875 | 20 | 2    |                      |                            |
| DMR6:86073001   | 6  | 86073001  | 86074000  | 1000 | 1 | 1.79E-05 | 0.7048133  | 8  | 0.8  |                      |                            |
| DMR6:93751001   | 6  | 93751001  | 93752000  | 1000 | 1 | 4.66E-05 | -1.0821604 | 10 | 1    | Dact1                | Signaling                  |
| DMR6:104890001  | 6  | 104890001 | 104891000 | 1000 | 1 | 2.06E-05 | -1.6632343 | 12 | 1.2  | Slc8a3               | Transport                  |
| DMR7:2539001    | 7  | 2539001   | 2540000   | 1000 | 1 | 6.82E-05 | -1.2581062 | 14 | 1.4  | Baz2a                | Transcription              |
| DMR7:42059001   | 7  | 42059001  | 42060000  | 1000 | 1 | 6.40E-05 | 0.6972441  | 6  | 0.6  |                      |                            |
| DMR7:49528001   | 7  | 49528001  | 49529000  | 1000 | 1 | 4.90E-05 | -1.4713297 | 11 | 1.1  | Lin7a                | Cell Junction              |
| DMR7:57264001   | 7  | 57264001  | 57265000  | 1000 | 1 | 6.83E-05 | -1.3399705 | 9  | 0.9  | Trhde                | Signaling                  |
| DMR7:70888001   | 7  | 70888001  | 70889000  | 1000 | 1 | 9.02E-05 | -1.0048366 | 15 | 1.5  | Lrp1                 | Receptor                   |
| DMR7:131975001  | 7  | 131975001 | 131976000 | 1000 | 1 | 1.47E-05 | -1.2733735 | 11 | 1.1  |                      |                            |
| DMR7:137481001  | 7  | 137481001 | 137482000 | 1000 | 1 | 8.85E-05 | -1.2863291 | 16 | 1.6  | AABR07058786.1       |                            |
| DMR7:138917001  | 7  | 138917001 | 138918000 | 1000 | 1 | 7.31E-05 | 0.8654201  | 36 | 3.6  |                      |                            |
| DMR8:18527001   | 8  | 18527001  | 18528000  | 1000 | 1 | 9.22E-05 | 0.9868114  | 7  | 0.7  | 7SK                  |                            |
| DMR8:52963001   | 8  | 52963001  | 52964000  | 1000 | 1 | 4.16E-05 | 0.7961608  | 13 | 1.3  |                      |                            |
| DMR8:57577001   | 8  | 57577001  | 57578000  | 1000 | 1 | 7.49E-05 | 0.9476768  | 15 | 1.5  |                      |                            |
| DMR8:58643001   | 8  | 58643001  | 58644000  | 1000 | 1 | 5.09E-05 | -1.2084926 | 17 | 1.7  | Tnfaip8l3            | Apoptosis                  |
| DMR8:70927001   | 8  | 70927001  | 70928000  | 1000 | 1 | 1.11E-06 | -1.2210697 | 19 | 1.9  | Rasl12;Slc51b        | Signaling                  |
| DMR8:80289001   | 8  | 80289001  | 80290000  | 1000 | 1 | 2.67E-06 | -1.4478261 | 9  | 0.9  | Unc13c               | Development                |
| DMR8:91614001   | 8  | 91614001  | 91615000  | 1000 | 1 | 4.29E-05 | 1.0211324  | 9  | 0.9  | Bckdhh               | Metabolism                 |
| DMR8:106027001  | 8  | 106027001 | 106029000 | 2000 | 1 | 6.11E-09 | -1.6979012 | 27 | 1.35 |                      |                            |
| DMR8:124407001  | 8  | 124407001 | 124408000 | 1000 | 1 | 9.70E-05 | 0.7332953  | 14 | 1.4  | Tgfb2;AABR07071619.1 | Growth Factors & Cytokines |
| DMR8:127551001  | 8  | 127551001 | 127552000 | 1000 | 1 | 8.69E-06 | -1.9314789 | 14 | 1.4  | Itga9                | Extracellular Matrix       |
| DMR9:18002001   | 9  | 18002001  | 18003000  | 1000 | 1 | 2.71E-06 | 0.6563751  | 3  | 0.3  | AABR07066826.2       |                            |
| DMR9:21223001   | 9  | 21223001  | 21224000  | 1000 | 1 | 2.72E-05 | 0.7185516  | 7  | 0.7  | Ptchd4               | Unknown                    |
| DMR9:37491001   | 9  | 37491001  | 37492000  | 1000 | 1 | 5.45E-05 | 0.7895008  | 10 | 1    | Lgsn                 | Metabolism                 |
| DMR9:63614001   | 9  | 63614001  | 63616000  | 2000 | 1 | 3.97E-05 | -0.9334226 | 37 | 1.85 | Satb2                | Epigenetic                 |
| DMR9:93284001   | 9  | 93284001  | 93285000  | 1000 | 1 | 3.74E-05 | -0.9874033 | 12 | 1.2  | Armc9                |                            |
| DMR9:98118001   | 9  | 98118001  | 98119000  | 1000 | 1 | 8.44E-05 | -1.0923702 | 15 | 1.5  | Rab17;Prlh;Mlph      | Signaling;Metabolism       |
| DMR9:113981001  | 9  | 113981001 | 113982000 | 1000 | 1 | 3.16E-07 | -1.7375351 | 9  | 0.9  |                      |                            |
| DMR10:29348001  | 10 | 29348001  | 29349000  | 1000 | 1 | 4.83E-05 | 0.9089051  | 9  | 0.9  | Ttc1                 |                            |
| DMR10:36911001  | 10 | 36911001  | 36912000  | 1000 | 1 | 2.23E-05 | -1.2680144 | 10 | 1    | LOC103693323         |                            |
| DMR10:42665001  | 10 | 42665001  | 42666000  | 1000 | 1 | 7.69E-05 | 0.6606703  | 4  | 0.4  | Gria1                | Receptor                   |
| DMR10:49966001  | 10 | 49966001  | 49967000  | 1000 | 1 | 1.32E-05 | -1.4173937 | 12 | 1.2  |                      |                            |
| DMR10:56191001  | 10 | 56191001  | 56192000  | 1000 | 1 | 5.13E-05 | 0.8438013  | 11 | 1.1  | Wrap53;Tp53          | Transcription              |
| DMR10:61493001  | 10 | 61493001  | 61494000  | 1000 | 1 | 4.50E-05 | 0.8913141  | 10 | 1    | Pafah1b1             | Metabolism                 |
| DMR10:63957001  | 10 | 63957001  | 63958000  | 1000 | 1 | 6.27E-05 | -1.6893128 | 7  | 0.7  | Doc2b                | Metabolism                 |
| DMR10:70044001  | 10 | 70044001  | 70045000  | 1000 | 1 | 3.67E-05 | -1.4806229 | 17 | 1.7  |                      |                            |
| DMR10:73520001  | 10 | 73520001  | 73521000  | 1000 | 1 | 7.95E-06 | -1.904646  | 13 | 1.3  | Brip1                | Transcription              |
| DMR10:102352001 | 10 | 102352001 | 102353000 | 1000 | 1 | 4.80E-06 | -1.3753481 | 15 | 1.5  | Sdk2                 | Development                |
| DMR11:6092001   | 11 | 6092001   | 6093000   | 1000 | 1 | 2.26E-05 | -0.6111178 | 9  | 0.9  |                      |                            |
| DMR11:16485001  | 11 | 16485001  | 16487000  | 2000 | 1 | 8.33E-05 | 0.8282516  | 24 | 1.2  |                      |                            |
| DMR11:23936001  | 11 | 23936001  | 23937000  | 1000 | 1 | 5.57E-05 | 1.0004708  | 6  | 0.6  |                      |                            |
| DMR11:48978001  | 11 | 48978001  | 48980000  | 2000 | 1 | 9.35E-06 | 0.96605    | 15 | 0.75 |                      |                            |
| DMR12:9902001   | 12 | 9902001   | 9904000   | 2000 | 1 | 6.56E-05 | -1.3764512 | 48 | 2.4  |                      |                            |
| DMR12:27029001  | 12 | 27029001  | 27030000  | 1000 | 1 | 8.87E-05 | -1.3448543 | 12 | 1.2  |                      |                            |
| DMR12:31493001  | 12 | 31493001  | 31494000  | 1000 | 1 | 8.71E-05 | -1.3139675 | 10 | 1    |                      |                            |
| DMR13:47759001  | 13 | 47759001  | 47760000  | 1000 | 1 | 9.66E-05 | 0.8659849  | 5  | 0.5  |                      |                            |
| DMR13:55027001  | 13 | 55027001  | 55028000  | 1000 | 1 | 4.81E-05 | -1.9035635 | 8  | 0.8  |                      |                            |
| DMR13:70111001  | 13 | 70111001  | 70112000  | 1000 | 1 | 1.84E-05 | -1.2287372 | 19 | 1.9  | Rgl1                 | Signaling                  |
| DMR13:70451001  | 13 | 70451001  | 70453000  | 2000 | 1 | 9.22E-05 | -1.0222183 | 23 | 1.15 | Nmnat2               | Metabolism                 |
| DMR13:71453001  | 13 | 71453001  | 71454000  | 1000 | 1 | 3.97E-06 | -1.4361173 | 13 | 1.3  | AABR07021430.1;U6    |                            |

|                 |    |           |           |      |   |          |            |    |      |                       |                      |
|-----------------|----|-----------|-----------|------|---|----------|------------|----|------|-----------------------|----------------------|
| DMR13:85241001  | 13 | 85241001  | 85242000  | 1000 | 1 | 5.67E-06 | -1.2233944 | 7  | 0.7  | Fam78b                |                      |
| DMR13:100699001 | 13 | 100699001 | 100700000 | 1000 | 1 | 1.99E-05 | 0.7406969  | 13 | 1.3  |                       |                      |
| DMR14:6911001   | 14 | 6911001   | 6912000   | 1000 | 1 | 4.27E-05 | -0.8234684 | 6  | 0.6  |                       |                      |
| DMR14:28989001  | 14 | 28989001  | 28990000  | 1000 | 1 | 6.47E-05 | 0.5572171  | 21 | 2.1  |                       |                      |
| DMR14:42227001  | 14 | 42227001  | 42228000  | 1000 | 1 | 1.13E-05 | -1.4844005 | 16 | 1.6  | Shisa3                |                      |
| DMR14:47471001  | 14 | 47471001  | 47472000  | 1000 | 1 | 1.86E-05 | -1.3590648 | 16 | 1.6  |                       |                      |
| DMR14:80029001  | 14 | 80029001  | 80030000  | 1000 | 1 | 5.57E-05 | 0.7561365  | 15 | 1.5  |                       |                      |
| DMR14:82904001  | 14 | 82904001  | 82905000  | 1000 | 1 | 6.33E-06 | 0.8531919  | 13 | 1.3  | Slc5a1                | Transport            |
| DMR14:88778001  | 14 | 88778001  | 88780000  | 2000 | 1 | 2.69E-05 | -1.1381718 | 51 | 2.55 | Tns3                  | Signaling            |
| DMR14:103536001 | 14 | 103536001 | 103537000 | 1000 | 1 | 3.87E-06 | -1.2612989 | 18 | 1.8  |                       |                      |
| DMR15:3087001   | 15 | 3087001   | 3088000   | 1000 | 1 | 5.21E-07 | -1.1817091 | 24 | 2.4  | Adk                   | Signaling            |
| DMR15:19021001  | 15 | 19021001  | 19022000  | 1000 | 1 | 1.21E-05 | -1.0974481 | 15 | 1.5  |                       |                      |
| DMR15:63809001  | 15 | 63809001  | 63810000  | 1000 | 1 | 4.86E-06 | -1.3419712 | 9  | 0.9  |                       |                      |
| DMR15:101911001 | 15 | 101911001 | 101912000 | 1000 | 1 | 1.93E-05 | -1.2513911 | 10 | 1    |                       |                      |
| DMR15:102306001 | 15 | 102306001 | 102307000 | 1000 | 1 | 5.81E-05 | -0.9432197 | 24 | 2.4  | Gpc6                  | Extracellular Matrix |
| DMR15:108017001 | 15 | 108017001 | 108018000 | 1000 | 1 | 3.10E-05 | -1.1704758 | 15 | 1.5  | Dock9                 | Cell Cycle           |
| DMR16:10694001  | 16 | 10694001  | 10695000  | 1000 | 1 | 8.53E-05 | 1.0109294  | 19 | 1.9  | Glud1;Fam25a          | Metabolism           |
| DMR16:12166001  | 16 | 12166001  | 12167000  | 1000 | 1 | 6.06E-05 | 0.952447   | 6  | 0.6  | LOC102553110          |                      |
| DMR16:62828001  | 16 | 62828001  | 62830000  | 2000 | 1 | 7.64E-05 | -1.1018184 | 23 | 1.15 |                       |                      |
| DMR17:15085001  | 17 | 15085001  | 15087000  | 2000 | 1 | 3.00E-05 | -0.8808335 | 42 | 2.1  | Fbxw17                |                      |
| DMR17:19077001  | 17 | 19077001  | 19078000  | 1000 | 1 | 5.93E-05 | 0.4812273  | 12 | 1.2  |                       |                      |
| DMR17:32588001  | 17 | 32588001  | 32589000  | 1000 | 1 | 5.11E-05 | 1.0698023  | 6  | 0.6  |                       |                      |
| DMR17:56820001  | 17 | 56820001  | 56821000  | 1000 | 1 | 5.34E-06 | -1.0771848 | 8  | 0.8  |                       |                      |
| DMR17:56920001  | 17 | 56920001  | 56921000  | 1000 | 1 | 4.90E-05 | 1.0527433  | 13 | 1.3  |                       |                      |
| DMR17:63444001  | 17 | 63444001  | 63445000  | 1000 | 1 | 9.08E-05 | -1.1381573 | 6  | 0.6  |                       |                      |
| DMR17:66241001  | 17 | 66241001  | 66242000  | 1000 | 1 | 7.54E-05 | -0.9266228 | 15 | 1.5  | Mtr;AABR07028349.1    | Epigenetic           |
| DMR17:83421001  | 17 | 83421001  | 83422000  | 1000 | 1 | 5.10E-05 | -1.0490777 | 17 | 1.7  | Plxdc2                | Binding Protein      |
| DMR17:87743001  | 17 | 87743001  | 87744000  | 1000 | 1 | 7.84E-06 | -1.2432519 | 12 | 1.2  | Arhgap21              |                      |
| DMR18:16242001  | 18 | 16242001  | 16243000  | 1000 | 1 | 3.35E-06 | 0.7291555  | 17 | 1.7  |                       |                      |
| DMR18:27257001  | 18 | 27257001  | 27258000  | 1000 | 1 | 8.29E-05 | 0.8634636  | 3  | 0.3  | Fam13b                |                      |
| DMR18:37538001  | 18 | 37538001  | 37539000  | 1000 | 1 | 3.14E-05 | -1.0317223 | 11 | 1.1  |                       |                      |
| DMR18:72292001  | 18 | 72292001  | 72293000  | 1000 | 1 | 7.30E-05 | 0.890582   | 15 | 1.5  | Zbtb7c                | Transcription        |
| DMR19:17087001  | 19 | 17087001  | 17089000  | 2000 | 1 | 4.88E-05 | -1.197427  | 28 | 1.4  | Fto                   |                      |
| DMR19:22061001  | 19 | 22061001  | 22062000  | 1000 | 1 | 2.24E-05 | -1.2743832 | 10 | 1    | Phkb                  | Signaling            |
| DMR19:32853001  | 19 | 32853001  | 32854000  | 1000 | 1 | 6.09E-05 | -0.8985307 | 21 | 2.1  | Slc10a7               |                      |
| DMR19:41230001  | 19 | 41230001  | 41232000  | 2000 | 1 | 5.80E-05 | 0.5209844  | 33 | 1.65 | Hydin                 | Unknown              |
| DMR19:47908001  | 19 | 47908001  | 47910000  | 2000 | 1 | 7.60E-05 | 0.6207979  | 18 | 0.9  |                       |                      |
| DMR19:48183001  | 19 | 48183001  | 48184000  | 1000 | 1 | 1.79E-05 | -1.6719455 | 18 | 1.8  |                       |                      |
| DMR20:35341001  | 20 | 35341001  | 35343000  | 2000 | 1 | 5.06E-05 | -1.2598997 | 33 | 1.65 | Man1a1;AABR07045140.1 | Golgi                |
| DMRX:96598001   | X  | 96598001  | 96599000  | 1000 | 1 | 4.78E-05 | 0.5774274  | 36 | 3.6  |                       |                      |

**Supplemental Table S5**  
**DMR Site Table Dioxin Testis Disease p<1e-04**

| DMR Name       | Chr | Start     | Stop      | Length | # Sig Win | minP     | maxLFC     | CpG # | CpG Density | Gene Annotation  | Gene Category       |
|----------------|-----|-----------|-----------|--------|-----------|----------|------------|-------|-------------|------------------|---------------------|
| DMR1:27828001  | 1   | 27828001  | 27829000  | 1000   | 1         | 6.27E-05 | -1.0200624 | 5     | 0.5         | Nkain2           | Transport           |
| DMR1:49018001  | 1   | 49018001  | 49021000  | 3000   | 1         | 4.37E-06 | 0.7645314  | 60    | 2           |                  |                     |
| DMR1:65641001  | 1   | 65641001  | 65642000  | 1000   | 1         | 5.38E-05 | 0.7632504  | 8     | 0.8         | AABR07002066.2   |                     |
| DMR1:76399001  | 1   | 76399001  | 76401000  | 2000   | 1         | 6.91E-07 | -0.9419477 | 11    | 0.55        | Sult2a1          | Metabolism          |
| DMR1:94016001  | 1   | 94016001  | 94017000  | 1000   | 1         | 4.09E-05 | -0.8567823 | 11    | 1.1         | AABR07003030.1   |                     |
| DMR1:114685001 | 1   | 114685001 | 114686000 | 1000   | 1         | 3.10E-05 | -1.0099441 | 3     | 0.3         | Oca2             | Transport           |
| DMR1:184251001 | 1   | 184251001 | 184252000 | 1000   | 1         | 8.03E-05 | -0.808145  | 8     | 0.8         |                  |                     |
| DMR1:187944001 | 1   | 187944001 | 187945000 | 1000   | 1         | 5.72E-05 | 0.5353141  | 18    | 1.8         |                  |                     |
| DMR1:231009001 | 1   | 231009001 | 231010000 | 1000   | 1         | 6.18E-05 | -1.1544129 | 2     | 0.2         |                  |                     |
| DMR1:240933001 | 1   | 240933001 | 240934000 | 1000   | 1         | 2.38E-05 | -0.8196913 | 18    | 1.8         | Klf9             | Transcription       |
| DMR1:246223001 | 1   | 246223001 | 246224000 | 1000   | 1         | 2.47E-05 | -0.5903982 | 18    | 1.8         |                  |                     |
| DMR1:279337001 | 1   | 279337001 | 279338000 | 1000   | 1         | 3.85E-05 | -1.1478473 | 3     | 0.3         |                  |                     |
| DMR2:17259001  | 2   | 17259001  | 17260000  | 1000   | 1         | 9.39E-05 | 0.7915525  | 1     | 0.1         |                  |                     |
| DMR2:19988001  | 2   | 19988001  | 19989000  | 1000   | 1         | 1.01E-05 | -0.9279788 | 14    | 1.4         | Atg10            |                     |
| DMR2:41213001  | 2   | 41213001  | 41214000  | 1000   | 1         | 9.22E-05 | -0.5606677 | 11    | 1.1         | Pde4d            | Metabolism          |
| DMR2:47949001  | 2   | 47949001  | 47950000  | 1000   | 1         | 1.27E-05 | -0.8959558 | 10    | 1           |                  |                     |
| DMR2:91514001  | 2   | 91514001  | 91515000  | 1000   | 1         | 6.34E-05 | -0.5386052 | 6     | 0.6         |                  |                     |
| DMR2:112483001 | 2   | 112483001 | 112484000 | 1000   | 1         | 1.21E-05 | 0.7197692  | 7     | 0.7         | Spata16          |                     |
| DMR2:133521001 | 2   | 133521001 | 133522000 | 1000   | 1         | 9.47E-05 | 0.9191366  | 7     | 0.7         |                  |                     |
| DMR2:155618001 | 2   | 155618001 | 155619000 | 1000   | 1         | 1.19E-05 | -0.8873484 | 8     | 0.8         |                  |                     |
| DMR2:175145001 | 2   | 175145001 | 175146000 | 1000   | 1         | 7.43E-05 | 0.7223356  | 4     | 0.4         | Fstl5            | Hormone             |
| DMR2:177907001 | 2   | 177907001 | 177908000 | 1000   | 1         | 1.40E-05 | 0.5964527  | 7     | 0.7         | Rapgef2          |                     |
| DMR2:203906001 | 2   | 203906001 | 203908000 | 2000   | 1         | 4.53E-05 | 0.5133551  | 27    | 1.35        |                  |                     |
| DMR2:214609001 | 2   | 214609001 | 214610000 | 1000   | 1         | 2.48E-05 | 0.8416226  | 2     | 0.2         |                  |                     |
| DMR2:224180001 | 2   | 224180001 | 224181000 | 1000   | 1         | 3.18E-05 | -0.7700959 | 4     | 0.4         |                  |                     |
| DMR2:224689001 | 2   | 224689001 | 224690000 | 1000   | 1         | 5.19E-05 | 0.8056632  | 14    | 1.4         |                  |                     |
| DMR2:228990001 | 2   | 228990001 | 228992000 | 2000   | 1         | 9.19E-05 | -0.4926704 | 29    | 1.45        |                  |                     |
| DMR2:241570001 | 2   | 241570001 | 241571000 | 1000   | 1         | 2.11E-06 | -1.0162965 | 9     | 0.9         |                  |                     |
| DMR2:242745001 | 2   | 242745001 | 242746000 | 1000   | 1         | 3.61E-05 | -0.7766994 | 7     | 0.7         |                  |                     |
| DMR2:252147001 | 2   | 252147001 | 252148000 | 1000   | 1         | 6.99E-05 | 0.4926826  | 17    | 1.7         | Lpar3            | Receptor            |
| DMR2:258993001 | 2   | 258993001 | 258994000 | 1000   | 1         | 2.76E-05 | -0.6298235 | 16    | 1.6         | Adgrl2           |                     |
| DMR2:261527001 | 2   | 261527001 | 261528000 | 1000   | 1         | 2.31E-05 | -0.8925409 | 11    | 1.1         |                  |                     |
| DMR3:15235001  | 3   | 15235001  | 15236000  | 1000   | 1         | 3.72E-05 | -0.714118  | 17    | 1.7         | AABR07051518.1   |                     |
| DMR3:25167001  | 3   | 25167001  | 25168000  | 1000   | 1         | 3.41E-05 | -1.0163172 | 4     | 0.4         |                  |                     |
| DMR3:29451001  | 3   | 29451001  | 29452000  | 1000   | 1         | 9.77E-05 | 0.5942622  | 14    | 1.4         | Gtdc1            | Metabolism          |
| DMR3:65048001  | 3   | 65048001  | 65049000  | 1000   | 1         | 3.79E-05 | 0.5616657  | 11    | 1.1         |                  |                     |
| DMR3:82165001  | 3   | 82165001  | 82166000  | 1000   | 1         | 4.33E-05 | -0.9116526 | 11    | 1.1         | Tspan18          | Cytoskeleton        |
| DMR3:83642001  | 3   | 83642001  | 83643000  | 1000   | 1         | 9.92E-05 | -0.67026   | 12    | 1.2         |                  |                     |
| DMR3:102189001 | 3   | 102189001 | 102190000 | 1000   | 1         | 6.47E-05 | 0.8053078  | 7     | 0.7         |                  |                     |
| DMR3:146558001 | 3   | 146558001 | 146559000 | 1000   | 1         | 5.22E-05 | 0.6641404  | 18    | 1.8         | Entpd6           | Signaling           |
| DMR3:150264001 | 3   | 150264001 | 150265000 | 1000   | 1         | 5.22E-05 | -0.6648348 | 11    | 1.1         |                  |                     |
| DMR3:152804001 | 3   | 152804001 | 152805000 | 1000   | 1         | 3.08E-05 | -0.8764615 | 10    | 1           | Dlgap4           | Unknown             |
| DMR3:154407001 | 3   | 154407001 | 154408000 | 1000   | 1         | 8.81E-05 | -0.7534899 | 25    | 2.5         | Vstm2l           | Unknown             |
| DMR4:12361001  | 4   | 12361001  | 12362000  | 1000   | 1         | 1.13E-06 | -1.0817062 | 4     | 0.4         | AABR07059258.1   |                     |
| DMR4:17463001  | 4   | 17463001  | 17464000  | 1000   | 1         | 3.78E-06 | 0.8265674  | 5     | 0.5         | Sema3e           | Development         |
| DMR4:49921001  | 4   | 49921001  | 49922000  | 1000   | 1         | 1.23E-05 | 0.8531439  | 8     | 0.8         |                  |                     |
| DMR4:53769001  | 4   | 53769001  | 53770000  | 1000   | 1         | 9.25E-06 | -0.8408241 | 9     | 0.9         |                  |                     |
| DMR4:56628001  | 4   | 56628001  | 56629000  | 1000   | 1         | 2.61E-05 | 0.7926485  | 18    | 1.8         | Calu             | Signaling           |
| DMR4:74595001  | 4   | 74595001  | 74598000  | 3000   | 1         | 4.05E-05 | -1.1714784 | 13    | 0.433       |                  |                     |
| DMR4:152215001 | 4   | 152215001 | 152216000 | 1000   | 1         | 4.54E-05 | 0.7143514  | 14    | 1.4         | Erc1             | Signaling           |
| DMR4:170526001 | 4   | 170526001 | 170527000 | 1000   | 1         | 9.25E-06 | -0.8117603 | 5     | 0.5         | Atf7ip           |                     |
| DMR5:12095001  | 5   | 12095001  | 12096000  | 1000   | 1         | 6.22E-06 | -0.615415  | 15    | 1.5         |                  |                     |
| DMR5:21340001  | 5   | 21340001  | 21341000  | 1000   | 1         | 5.79E-05 | -0.6478108 | 9     | 0.9         | Ca8              |                     |
| DMR5:58418001  | 5   | 58418001  | 58419000  | 1000   | 1         | 4.96E-05 | -1.0104568 | 5     | 0.5         | LOC100360821;Vcp | Cytoskeleton        |
| DMR5:66364001  | 5   | 66364001  | 66365000  | 1000   | 1         | 3.66E-05 | -0.9111269 | 11    | 1.1         |                  |                     |
| DMR5:105997001 | 5   | 105997001 | 105998000 | 1000   | 1         | 3.14E-05 | 0.7063719  | 7     | 0.7         |                  |                     |
| DMR5:143445001 | 5   | 143445001 | 143446000 | 1000   | 1         | 7.95E-05 | 0.4846632  | 16    | 1.6         |                  |                     |
| DMR5:154897001 | 5   | 154897001 | 154899000 | 2000   | 1         | 6.70E-05 | -0.6888256 | 19    | 0.95        | Luzp1            | Transcription       |
| DMR6:8321001   | 6   | 8321001   | 8322000   | 1000   | 1         | 1.51E-06 | 0.7538343  | 20    | 2           | Slc3a1;Prepl     | Metabolism;Protease |

|                 |    |           |           |      |   |          |            |    |      |                            |                    |
|-----------------|----|-----------|-----------|------|---|----------|------------|----|------|----------------------------|--------------------|
| DMR6:11879001   | 6  | 11879001  | 11880000  | 1000 | 1 | 5.69E-05 | 0.4711699  | 17 | 1.7  |                            |                    |
| DMR6:44385001   | 6  | 44385001  | 44386000  | 1000 | 1 | 3.52E-06 | -0.9512991 | 15 | 1.5  |                            |                    |
| DMR6:59059001   | 6  | 59059001  | 59060000  | 1000 | 1 | 6.80E-05 | 0.6023233  | 4  | 0.4  |                            |                    |
| DMR6:141711001  | 6  | 141711001 | 141713000 | 2000 | 1 | 2.80E-05 | -0.8252775 | 17 | 0.85 | AABR07065798.1             |                    |
| DMR7:14083001   | 7  | 14083001  | 14084000  | 1000 | 1 | 6.40E-05 | 0.8670147  | 9  | 0.9  |                            |                    |
| DMR7:28227001   | 7  | 28227001  | 28228000  | 1000 | 1 | 1.65E-05 | -1.085505  | 8  | 0.8  |                            |                    |
| DMR7:53950001   | 7  | 53950001  | 53951000  | 1000 | 1 | 5.93E-05 | 0.5939087  | 11 | 1.1  | Osbp18                     | Receptor           |
| DMR7:60473001   | 7  | 60473001  | 60474000  | 1000 | 1 | 2.51E-05 | 0.6787079  | 11 | 1.1  |                            |                    |
| DMR7:67104001   | 7  | 67104001  | 67105000  | 1000 | 1 | 3.28E-05 | 0.8250012  | 19 | 1.9  | Ppm1h                      | Signaling          |
| DMR7:88514001   | 7  | 88514001  | 88515000  | 1000 | 1 | 3.39E-05 | -0.8757942 | 5  | 0.5  |                            |                    |
| DMR7:100666001  | 7  | 100666001 | 100667000 | 1000 | 1 | 1.04E-06 | -0.776049  | 15 | 1.5  |                            |                    |
| DMR7:124601001  | 7  | 124601001 | 124602000 | 1000 | 1 | 2.77E-05 | -0.9039286 | 20 | 2    | Scube1                     | Signaling          |
| DMR7:136468001  | 7  | 136468001 | 136470000 | 2000 | 1 | 2.23E-05 | -0.8306497 | 10 | 0.5  | AABR07058758.1             |                    |
| DMR7:140114001  | 7  | 140114001 | 140115000 | 1000 | 1 | 8.90E-05 | -0.8008501 | 15 | 1.5  | Olr1111                    |                    |
| DMR7:140518001  | 7  | 140518001 | 140519000 | 1000 | 1 | 5.04E-06 | -0.6255522 | 30 | 3    | Kmt2d                      | Transcription      |
| DMR8:1216001    | 8  | 1216001   | 1218000   | 2000 | 1 | 6.14E-05 | -0.6103954 | 15 | 0.75 |                            |                    |
| DMR8:99556001   | 8  | 99556001  | 99558000  | 2000 | 1 | 9.47E-05 | -0.742321  | 31 | 1.55 |                            |                    |
| DMR8:110552001  | 8  | 110552001 | 110554000 | 2000 | 1 | 8.49E-05 | -0.8148463 | 23 | 1.15 | Ephb1                      | Receptor           |
| DMR9:13231001   | 9  | 13231001  | 13232000  | 1000 | 1 | 8.08E-05 | -0.7820539 | 14 | 1.4  | Kif6                       | Cytoskeleton       |
| DMR9:40429001   | 9  | 40429001  | 40430000  | 1000 | 1 | 5.14E-05 | 0.7770004  | 2  | 0.2  |                            |                    |
| DMR9:43332001   | 9  | 43332001  | 43333000  | 1000 | 1 | 8.99E-05 | 0.6254894  | 15 | 1.5  | U4;Zap70                   | Signaling          |
| DMR9:70001001   | 9  | 70001001  | 70002000  | 1000 | 1 | 5.25E-05 | 0.5800757  | 12 | 1.2  | AC141169.2                 |                    |
| DMR9:73059001   | 9  | 73059001  | 73061000  | 2000 | 1 | 6.78E-05 | 0.8503539  | 18 | 0.9  |                            |                    |
| DMR9:82796001   | 9  | 82796001  | 82797000  | 1000 | 1 | 3.07E-05 | -0.5873505 | 14 | 1.4  | AABR07068085.4             |                    |
| DMR9:90659001   | 9  | 90659001  | 90660000  | 1000 | 1 | 5.64E-05 | -0.8205154 | 1  | 0.1  | AABR07068203.1             |                    |
| DMR9:96096001   | 9  | 96096001  | 96097000  | 1000 | 1 | 9.53E-06 | -0.9370212 | 15 | 1.5  |                            |                    |
| DMR10:9426001   | 10 | 9426001   | 9427000   | 1000 | 1 | 1.66E-05 | 0.5641217  | 10 | 1    |                            |                    |
| DMR10:16890001  | 10 | 16890001  | 16891000  | 1000 | 1 | 1.95E-05 | 0.6235173  | 13 | 1.3  | Ergic1                     |                    |
| DMR10:48805001  | 10 | 48805001  | 48806000  | 1000 | 1 | 2.50E-05 | -0.7099008 | 5  | 0.5  | Pigl                       | Metabolism         |
| DMR10:55065001  | 10 | 55065001  | 55066000  | 1000 | 1 | 6.63E-05 | 0.7139579  | 16 | 1.6  | Pik3r5                     | Signaling          |
| DMR10:63500001  | 10 | 63500001  | 63501000  | 1000 | 1 | 1.39E-05 | 0.5676834  | 14 | 1.4  | Trarg1;Bhlha9              | Transcription      |
| DMR10:69982001  | 10 | 69982001  | 69983000  | 1000 | 1 | 6.08E-05 | 0.464357   | 11 | 1.1  |                            |                    |
| DMR10:70395001  | 10 | 70395001  | 70396000  | 1000 | 1 | 1.88E-05 | -0.9197455 | 12 | 1.2  | AC128859.3                 |                    |
| DMR11:34669001  | 11 | 34669001  | 34670000  | 1000 | 1 | 6.72E-05 | -0.8309872 | 24 | 2.4  | Ttc3                       | Unknown            |
| DMR11:60366001  | 11 | 60366001  | 60368000  | 2000 | 1 | 3.94E-05 | -0.7752417 | 12 | 0.6  | LOC685767;Cd200            | Immune             |
| DMR11:69697001  | 11 | 69697001  | 69698000  | 1000 | 1 | 7.55E-05 | 0.757676   | 9  | 0.9  | Kalrn                      | Signaling          |
| DMR11:71105001  | 11 | 71105001  | 71106000  | 1000 | 1 | 6.44E-05 | 0.6624201  | 4  | 0.4  | lqcg;Lrch3                 | Unknown            |
| DMR13:22789001  | 13 | 22789001  | 22790000  | 1000 | 1 | 9.60E-05 | -0.5444003 | 9  | 0.9  |                            |                    |
| DMR13:28132001  | 13 | 28132001  | 28133000  | 1000 | 1 | 1.90E-05 | -1.0265831 | 7  | 0.7  |                            |                    |
| DMR14:10145001  | 14 | 10145001  | 10146000  | 1000 | 1 | 9.55E-05 | -0.6799463 | 16 | 1.6  |                            |                    |
| DMR14:16786001  | 14 | 16786001  | 16787000  | 1000 | 1 | 2.36E-05 | -0.886314  | 22 | 2.2  | Shroom3                    | Cytoskeleton       |
| DMR14:33277001  | 14 | 33277001  | 33278000  | 1000 | 1 | 7.44E-05 | -0.6669061 | 14 | 1.4  |                            |                    |
| DMR14:91412001  | 14 | 91412001  | 91413000  | 1000 | 1 | 8.20E-05 | -0.8428354 | 7  | 0.7  | Zbbp                       | Development        |
| DMR14:100107001 | 14 | 100107001 | 100108000 | 1000 | 1 | 7.08E-08 | -1.2470118 | 13 | 1.3  | Egfr                       | Receptor           |
| DMR15:52681001  | 15 | 52681001  | 52683000  | 2000 | 1 | 5.46E-05 | -0.8166652 | 10 | 0.5  |                            |                    |
| DMR16:1737001   | 16 | 1737001   | 1739000   | 2000 | 1 | 9.42E-05 | -0.8272326 | 32 | 1.6  |                            |                    |
| DMR16:31944001  | 16 | 31944001  | 31945000  | 1000 | 1 | 8.03E-05 | -0.8357159 | 16 | 1.6  | AABR07025295.1             |                    |
| DMR16:53574001  | 16 | 53574001  | 53575000  | 1000 | 1 | 9.73E-05 | 0.848981   | 8  | 0.8  |                            |                    |
| DMR16:71269001  | 16 | 71269001  | 71270000  | 1000 | 1 | 5.64E-05 | -0.708019  | 20 | 2    | Letm2;Fgfr1;AABR07026305.1 | Signaling;Receptor |
| DMR17:1728001   | 17 | 1728001   | 1730000   | 2000 | 1 | 3.09E-05 | -0.7903019 | 19 | 0.95 | Cdc14b;U4                  | Signaling          |
| DMR17:4679001   | 17 | 4679001   | 4680000   | 1000 | 1 | 6.72E-05 | -0.5028561 | 18 | 1.8  |                            |                    |
| DMR17:7735001   | 17 | 7735001   | 7736000   | 1000 | 1 | 7.41E-05 | -0.6438113 | 19 | 1.9  | Spock1                     | Cytoskeleton       |
| DMR17:34229001  | 17 | 34229001  | 34231000  | 2000 | 1 | 3.07E-05 | 0.6562757  | 20 | 1    | Foxq1                      | Transcription      |
| DMR17:60741001  | 17 | 60741001  | 60742000  | 1000 | 1 | 1.20E-05 | -0.6187929 | 13 | 1.3  |                            |                    |
| DMR17:78665001  | 17 | 78665001  | 78666000  | 1000 | 1 | 4.69E-05 | 0.7096773  | 20 | 2    |                            |                    |
| DMR18:1605001   | 18 | 1605001   | 1607000   | 2000 | 1 | 3.56E-05 | 0.6490437  | 16 | 0.8  |                            |                    |
| DMR18:2500001   | 18 | 2500001   | 2501000   | 1000 | 1 | 4.27E-05 | 0.6353685  | 14 | 1.4  | AABR07031164.1             |                    |
| DMR18:63505001  | 18 | 63505001  | 63506000  | 1000 | 1 | 9.20E-05 | -0.5827948 | 14 | 1.4  |                            |                    |
| DMR19:48134001  | 19 | 48134001  | 48135000  | 1000 | 1 | 3.26E-05 | -0.7417181 | 9  | 0.9  |                            |                    |
| DMR20:8234001   | 20 | 8234001   | 8235000   | 1000 | 1 | 1.54E-05 | 0.6435351  | 13 | 1.3  | Tbc1d22b                   | Signaling          |
| DMR20:29667001  | 20 | 29667001  | 29668000  | 1000 | 1 | 6.16E-08 | 0.7912614  | 16 | 1.6  | Spock2                     | Signaling          |
| DMR20:42974001  | 20 | 42974001  | 42975000  | 1000 | 1 | 2.00E-05 | 0.7062043  | 4  | 0.4  | AABR07045321.2;Marcks      |                    |
| DMRX:3189001    | X  | 3189001   | 3190000   | 1000 | 1 | 1.82E-05 | 0.8785281  | 8  | 0.8  |                            |                    |
| DMRX:119604001  | X  | 119604001 | 119605000 | 1000 | 1 | 5.52E-05 | -0.7455489 | 8  | 0.8  | U6                         |                    |
